# Supplementary material for: Green and sustainable synthesis of TPD-based donor–acceptor-type conjugated polymer photocatalysts for hydrogen production under visible light
Source: Royal Society of Chemistry journal article supplement (doi:10.1039/d3gc04350a), 2023-11-29
Supplement: d3gc04350a1.pdf [file d3gc04350a1.pdf]

## Supporting Information

### **Green, Sustainable synthesis of TPD-based donor-acceptor-type conjugated polymer photocatalysts for hydrogen production under visible light**

Menghan Chang,<sup>‡</sup> Xinjuan Zhang,<sup>‡</sup> Lin Wang, Di Wang, Qiang Zhang,\* and Yan Lu\*

*Key Laboratory of Display Materials & Photoelectric Devices, Ministry of Education,  
Tianjin Key Laboratory for Photoelectric Materials and Devices, School of Materials  
Science & Engineering, Tianjin University of Technology, Tianjin 300384, China*

\*Corresponding author:

E-mail: zhangqiang@email.tjut.edu.cn (Q. Zhang); luyan@tjut.edu.cn (Y. Lu).

<sup>‡</sup> These authors contributed equally to this work.

## Experimental section

### Materials

5-(2-octyl-1-dodecyl)-4H-thieno[3,4-c]pyrrole-4,6(5H)-dione, 3,3'-dioctyl-2,2'-bithiophene, 4,4'-dioctyl-cyclopenta[2,1-b:3,4-b']dithiophene, 8-bis(octyloxy)benzo[1,2-b:4,5-b']dithiophene, silver carbonate ( $\text{Ag}_2\text{CO}_3$ ), and potassium acetate (KOAc) were purchased from Beijing J&K Scientific Co., LTD. Ascorbic acid (AA) and chloroplatinic acid ( $\text{H}_2\text{PtCl}_6$ ) were obtained from Tianjin Heowns Biochem Technologies LLC. Trans-bis(acetato)bis[2-[bis(2-methylphenyl)phosphino]benzyl]-dipalladium(II) (Herrmann's catalyst), dichloro[1,1'-bis(diphenylphosphino)ferrocene] palladium(II) ( $\text{Pd}(\text{dppf})\text{Cl}_2$ ), bis(tertbutyldicyclohexylphosphine)dichloropalladium(II) [ $\text{Pd}(\text{tbdchp})_2\text{Cl}_2$ ], tetrakis(triphenylphosphine)palladium(0) ( $\text{Pd}(\text{PPh}_3)_4$ ), di-*t*-butylmethylphosphonium tetrafluoroborate [ $\text{P}(\text{t-Bu})_2\text{MeHBF}_4$ ], tricyclohexyl phosphine[ $\text{PCy}_3$ ], tricyclohexylphosphonium tetrafluoroborate[ $\text{PCy}_3\text{HBF}_4$ ], and tris(2-methoxyphenyl)phosphine [ $\text{P}(\text{2-MeOC}_6\text{H}_4)_3$ ] were bought from Sigma-Aldrich (Shanghai) Trading Co., LTD. Anhydrous *N,N*-dimethylacetamide (DMAc) and xylene were purchased from Beijing J&K Scientific Co., LTD. Tetrahydrofuran (THF), trichloromethane ( $\text{CHCl}_3$ ), anhydrous methanol, and *n*-hexane were provided by Tianjin Hengshan Chemical Co. All other solvents and reagents (analytical and spectroscopic grades) were obtained commercially and used directly, unless otherwise stated.

### Instruments

$^1\text{H}$ ,  $^{13}\text{C}$ , HSQC and HMBC NMR spectra were obtained on a Bruker AV400 at 25°C using tetramethylsilane (TMS) as an internal standard. Number-average ( $M_n$ ) and polydispersity index (PDI) were determined by size exclusion chromatography (SEC) in tetrahydrofuran at 25 °C using Waters 1525 with Waters Styragel HT gel columns. Monodisperse polystyrene standards (Shodex) was used to establish the calibration curve. UV-Vis absorption spectra were recorded using a Shimadzu UV-2550 and dropcast films on glass plates were used for the solid-state measurements. Optical bandgap was determined from the onset of the absorption band. Fluorescence spectra were collected on a Hitachi F-4600 fluorescence spectrophotometer equipped with a xenon lamp excitation source. Thermogravimetric analysis (TGA) was used to determine the decomposition temperature, which was ramped up from 25 °C to 1000 °C at a rate of 10 °C/min. Particle size measurements were

performed using a Morven ZetaSizerNanoZS90. Transmission electron microscopy (TEM) images of the synthesized nanoparticles were obtained using a FEIT ecnai G2 Spirit TWIN transmission electron microscope while energy-dispersive spectroscopy (EDS) data were obtained. Water contact angles were measured using KRUSS DSA100 measurement instrument (Shanghai Fang Rui Instrument Co. Ltd.). Pd content was determined by inductively coupled plasma optical emission spectrometer (Agilent ICP-OES 725). Time-resolved PL was acquired on an Edinburgh FLS980 spectrophotometer.

### **Electrochemical measurements**

Cyclic voltammetry (CV) was performed on an LK2005A electrochemical apparatus in a three-neck flask consisting of a three-electrode structure under a nitrogen atmosphere. A glassy carbon electrode, a saturated heat electrode and a platinum electrode were used as the working, reference and counter electrodes, respectively.  $\text{Bu}_4\text{NPF}_6$  (0.1 mol/L) in anhydrous acetonitrile was used as the supporting electrode. The electrodes were polished with aluminum powder and cleaned with distilled water and acetonitrile. The polymer drop-cast film prepared with chloroform solution on the working electrode was scanned at least three times at a rate of  $100 \text{ mV}^{-1}$ .

Electrochemical impedance spectra (EIS) were recorded on a CIMPS-2 electrochemical workstation (Zahner Electrochemie, Germany) with a standard three-electrode system. A platinum plate as counter electrode, glassy carbon electrode as working electrode, saturated calomel electrode (SCE) as reference electrode, and 0.2 M  $\text{Na}_2\text{SO}_4$  solution as electrolyte were applied in the measurements (pH = 6.8), respectively. Time-current curves were obtained on an LK2005A electrochemical apparatus (Lanlike, China) in a three-neck flask consisting of a three-electrode structure under a nitrogen atmosphere. A fluorine doped tin oxide (FTO) coated glass, a platinum electrode and a saturated calomel electrode were used as the working, counter and reference electrodes, respectively. An electrolyte solution of 0.2 M was prepared with ultrapure water and  $\text{Na}_2\text{SO}_4$ , and irradiated every 30 s using a CEL-HXF300E light source.

### **Apparent quantum yields measurements**

The apparent quantum yield at different wavelengths was measured by inserting 400 nm, 450 nm, 500 nm, 550 nm, and 600 nm band-pass filters, and the irradiation was continued for 2 h for each

wavelength region. The light intensity in the photocatalytic reaction was measured using a calibrated power meter (Model 843R, Newport). The apparent quantum yields (AQY) was calculated according to the following equation:

$$AQY = \frac{\text{number of evolved } H_2 \text{ molecules} \times 2}{\text{number of incident photons}} \times 100\%$$

$$AQY = \frac{2M \times N_A \times h \times c}{S \times P \times t \times \lambda} \times 100\%$$

where M is the amount of H<sub>2</sub> molecules (mol); N<sub>A</sub> is the Avogadro constant (6.022 × 10<sup>23</sup> mol<sup>-1</sup>); h is the Planck constant (6.626 × 10<sup>-34</sup> J•s); c is vacuum light velocity (2.997 × 10<sup>8</sup> m•s<sup>-1</sup>); the irradiation area (S) is 25.5 cm<sup>2</sup> in our experiment; P is the intensity of the irradiating light (W•cm<sup>-2</sup>); t is the photoreaction time (s); and λ is the wavelength of the monochromatic light (m).

## DFT calculations

All calculations were performed based on the density functional theory in Gaussian 09 programs<sup>1</sup>. The geometry optimizations and the spin density surfaces of the polymers were performed at the B3LYP/6-31G<sup>2-6</sup>. Four repeating units were used and the side chains were replaced with methyl groups to reduce the computation time according to the literatures<sup>7</sup>. All optimized structures were not imaginary frequency.

The reaction Gibbs free energy (ΔG<sub>H\*</sub>) for hydrogen adsorption is determined by:

$$\Delta G_{H^*} = \Delta E_{H^*} + \Delta E_{ZPE} - T\Delta S_H$$

the ΔE<sub>H\*</sub> is the integral adsorption energy of H adsorbates calculated by the formula of ΔE<sub>H\*</sub> = E<sub>oligomer + H</sub> - E<sub>oligomer</sub> - 1/2 E<sub>H<sub>2</sub></sub>, where E<sub>oligomer+H</sub>, E<sub>oligomer</sub> and E<sub>H<sub>2</sub></sub> represent the total energies of oligomer with one adsorbed H atoms, total energies of oligomer and H<sub>2</sub> gas, respectively. ΔE<sub>ZPE</sub> and ΔS<sub>H</sub> are the changes in the zero-point energy and entropy between H atoms adsorption state and the gas-phase state of H<sub>2</sub>. The ΔE<sub>ZPE</sub> is calculated by the formula of ΔE<sub>ZPE</sub> = E<sub>ZPE (oligomer + H)</sub> - E<sub>ZPE (oligomer)</sub> - 1/2 E<sub>ZPE (H<sub>2</sub>)</sub>. The ΔS<sub>H</sub> is calculated by the formula of ΔS<sub>H</sub> ≈ 1/2 S<sub>H<sub>2</sub></sub>, where S<sub>H<sub>2</sub></sub> is entropy of the gas-phase state of H<sub>2</sub> at standard condition.

**Table S1.** The screening of the reaction conditions for the polymerization of TPD2T by C-H/C-H cross-coupling polycondensation <sup>a</sup>

| Entry | Catalyst                                | Additive                                            | Solvent (v/v)      | T (°C) | Yield <sup>b</sup> (%) | $M_n$ <sup>c</sup> (kDa) | PDI  |
|-------|-----------------------------------------|-----------------------------------------------------|--------------------|--------|------------------------|--------------------------|------|
| 1     | Heremann's cat.                         | -                                                   | DMAc               | 100    | 58.7                   | 3.8                      | 1.84 |
| 2     | Heremann's cat.                         | PCy <sub>3</sub>                                    | DMAc               | 100    | 56.7                   | 5.0                      | 1.47 |
| 3     | Heremann's cat.                         | P(2-MeOC <sub>6</sub> H <sub>4</sub> ) <sub>3</sub> | DMAc               | 100    | 53.7                   | 4.0                      | 1.71 |
| 4     | Heremann's cat.                         | PCy <sub>3</sub> HBF <sub>4</sub>                   | DMAc               | 100    | 58.5                   | 4.7                      | 1.46 |
| 5     | Heremann's cat.                         | P(t-Bu) <sub>2</sub> MeHBF <sub>4</sub>             | DMAc               | 100    | 70.4                   | 10.7                     | 2.11 |
| 6     | Pd(dppf)Cl <sub>2</sub>                 | P(t-Bu) <sub>2</sub> MeHBF <sub>4</sub>             | DMAc               | 80     | 52.7                   | 3.7                      | 1.87 |
| 7     | Pd(tbdchp) <sub>2</sub> Cl <sub>2</sub> | P(t-Bu) <sub>2</sub> MeHBF <sub>4</sub>             | DMAc               | 80     | 32.1                   | 4.6                      | 1.34 |
| 8     | Pd(PPh <sub>3</sub> ) <sub>4</sub>      | P(t-Bu) <sub>2</sub> MeHBF <sub>4</sub>             | DMAc               | 80     | 63.4                   | 12.5                     | 1.21 |
| 9     | Pd(PPh <sub>3</sub> ) <sub>4</sub>      | P(t-Bu) <sub>2</sub> MeHBF <sub>4</sub>             | DMAc/xylene (20:1) | 80     | 55.3                   | 9.1                      | 1.67 |
| 10    | Pd(PPh <sub>3</sub> ) <sub>4</sub>      | P(t-Bu) <sub>2</sub> MeHBF <sub>4</sub>             | DMAc/xylene (10:1) | 80     | 48.2                   | 9.3                      | 1.53 |
| 11    | Pd(PPh <sub>3</sub> ) <sub>4</sub>      | P(t-Bu) <sub>2</sub> MeHBF <sub>4</sub>             | DMAc/xylene (7:3)  | 80     | 46.7                   | 10.3                     | 1.54 |
| 12    | Pd(PPh <sub>3</sub> ) <sub>4</sub>      | P(t-Bu) <sub>2</sub> MeHBF <sub>4</sub>             | DMAc/xylene (1:1)  | 80     | 57.5                   | 18.1                     | 1.26 |

<sup>a</sup> Reaction conditions: TPD (0.1 mmol), 2T (0.1 mmol), catalyst (10 mol%), additive (20 mol%), Ag<sub>2</sub>CO<sub>3</sub> (0.4 mmol), KOAc (0.4 mmol) in 1 mL of solvent for 48 h. <sup>b</sup> Isolated yield after purification.

<sup>c</sup> Estimated by GPC measurements (eluent: THF, standard: polystyrene).

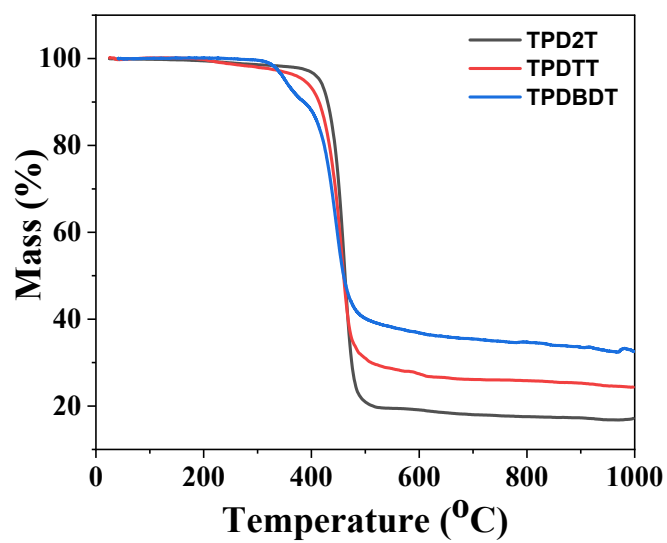

Fig. S1. TGA curves of polymers TPD2T, TPDTT, and TPDBDT.

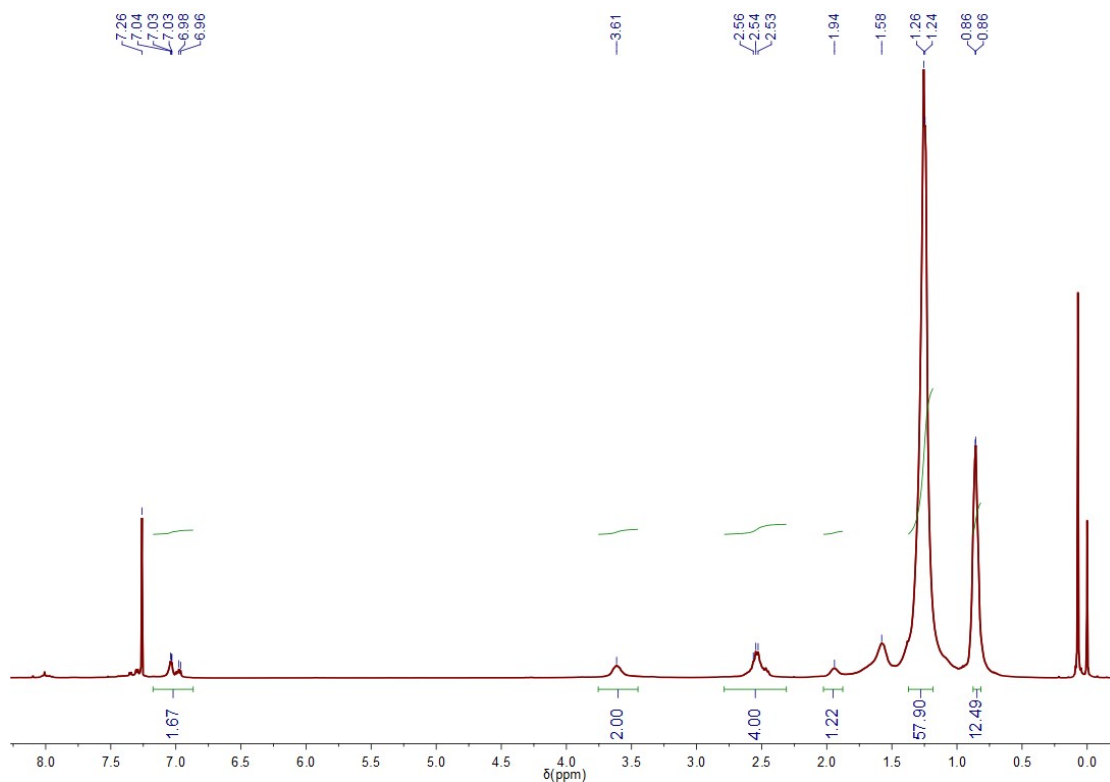

Fig. S2. <sup>1</sup>H NMR spectrum in CDCl<sub>3</sub> of TPD2T (entry 12, Table S1).

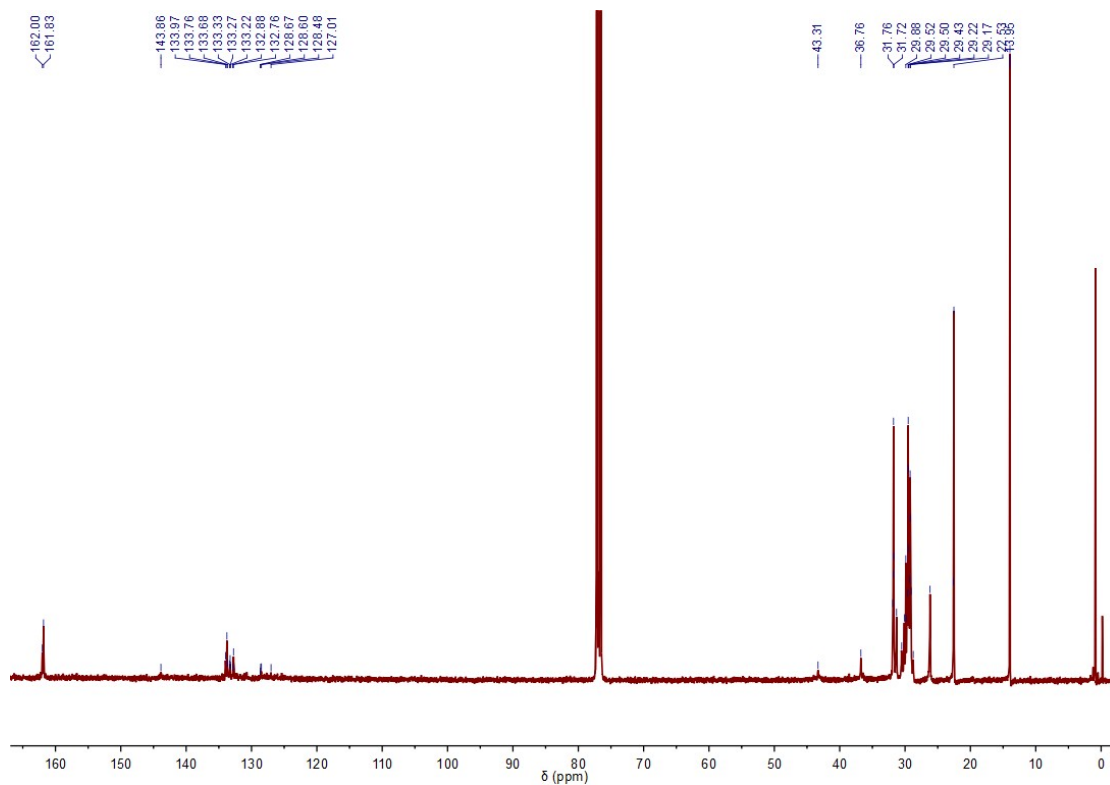

Fig. S3.  $^{13}\text{C}$  NMR spectrum in  $\text{CDCl}_3$  of TPD2T (entry 12, Table S1).

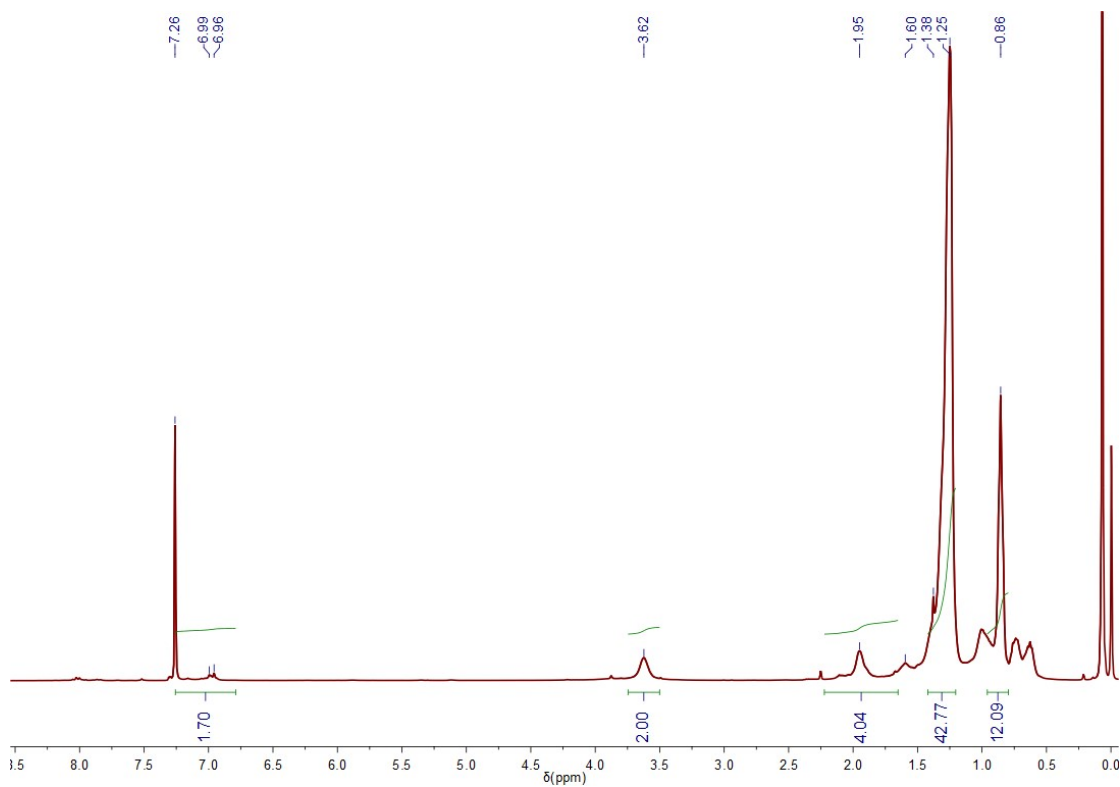

Fig. S4.  $^1\text{H}$  NMR spectrum in  $\text{CDCl}_3$  of TPD2T

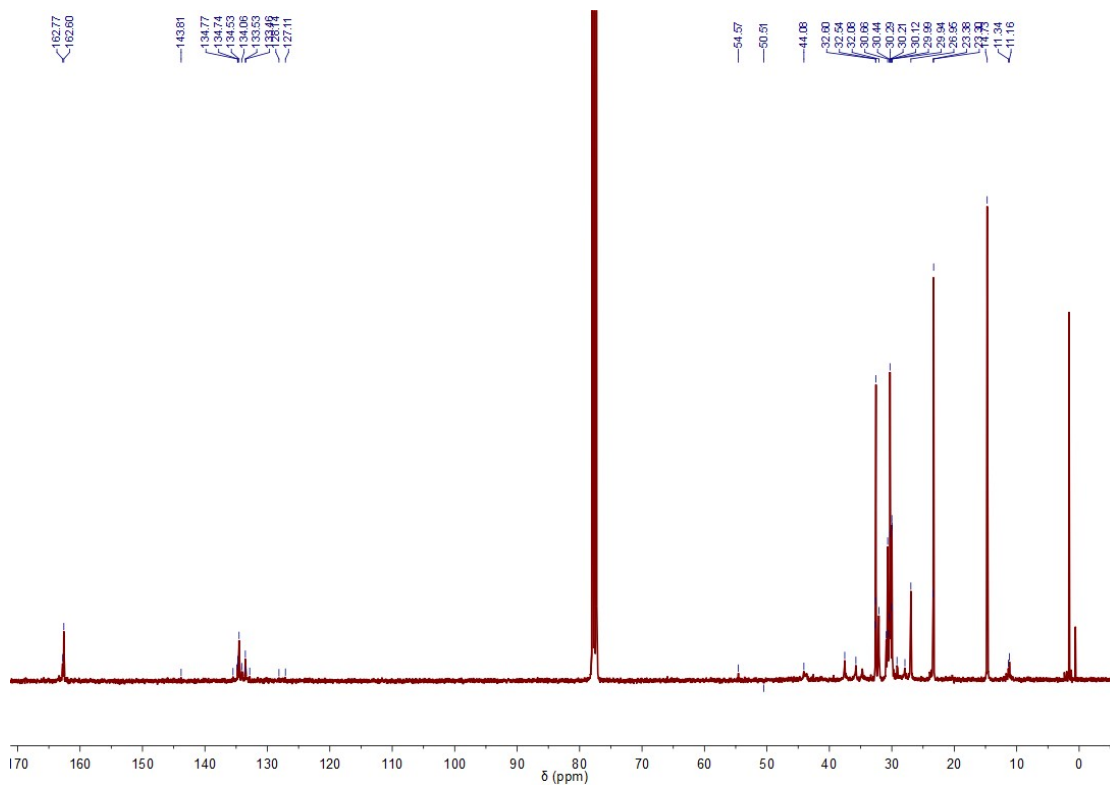

Fig. S5.  $^{13}\text{C}$  NMR spectrum in  $\text{CDCl}_3$  of TPDDT

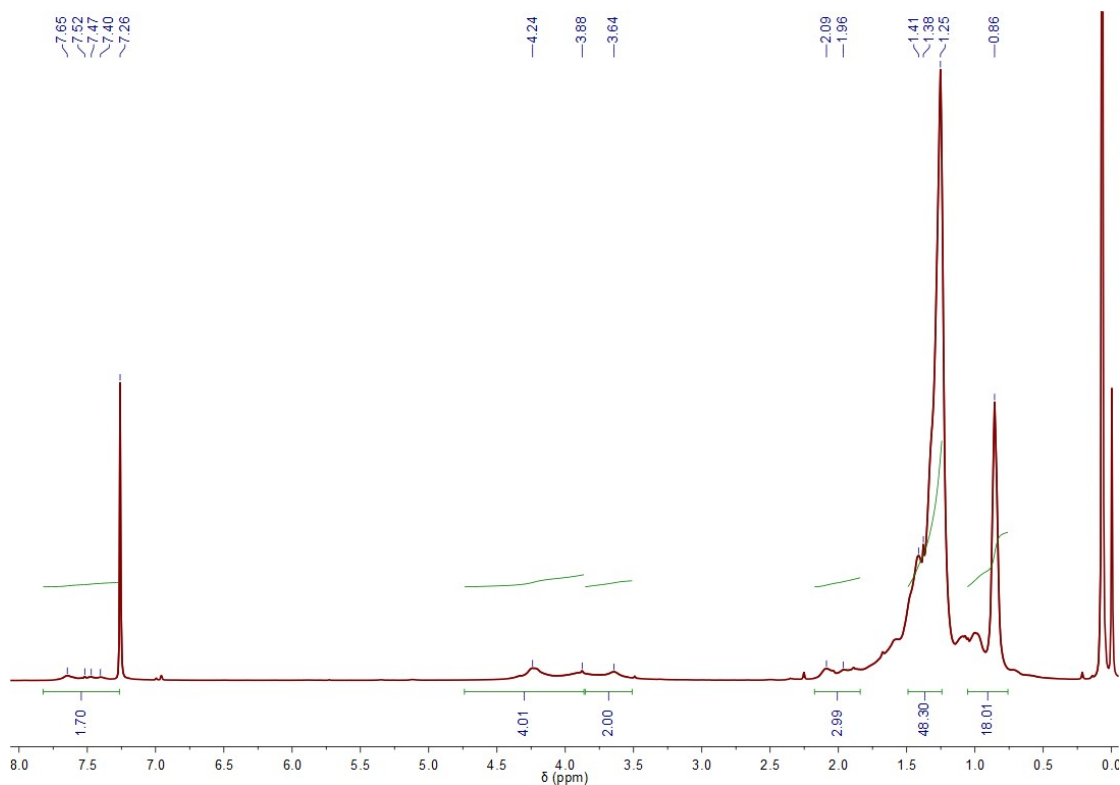

Fig. S6.  $^1\text{H}$  NMR spectrum in  $\text{CDCl}_3$  of TPDBDT



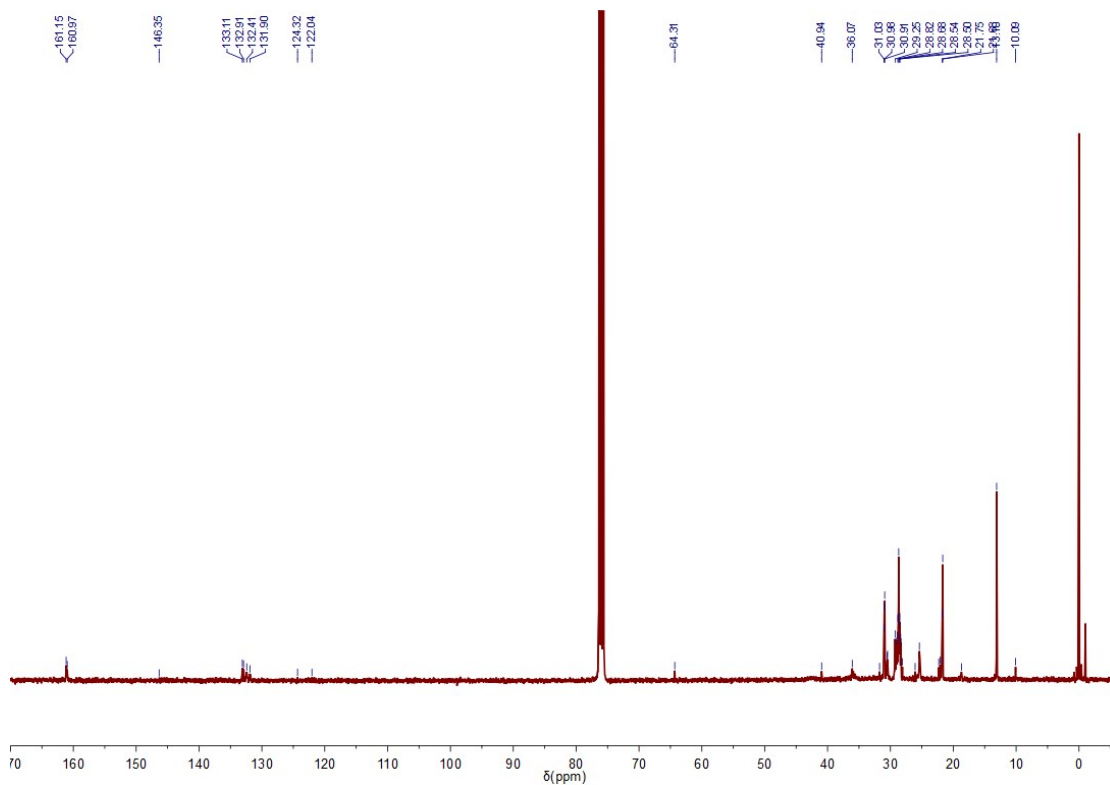

Fig. S7.  $^{13}\text{C}$  NMR spectrum in  $\text{CDCl}_3$  of TPDBDT

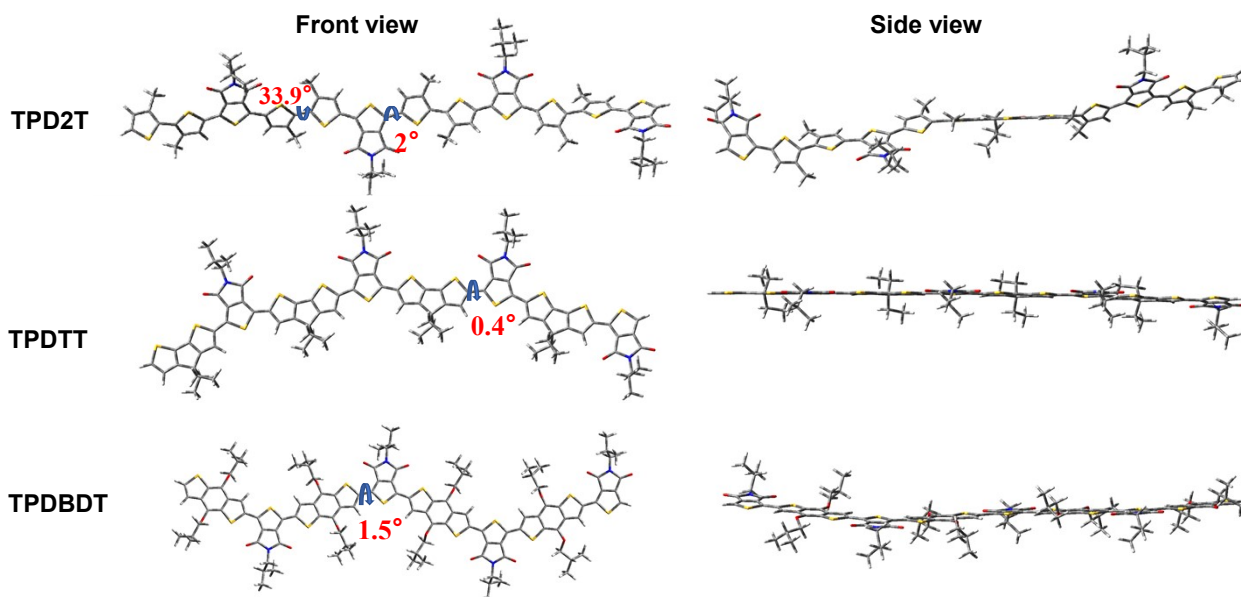

Fig. S8. Optimized molecular geometries of TPD2T, TPDTT, and TPDBDT.

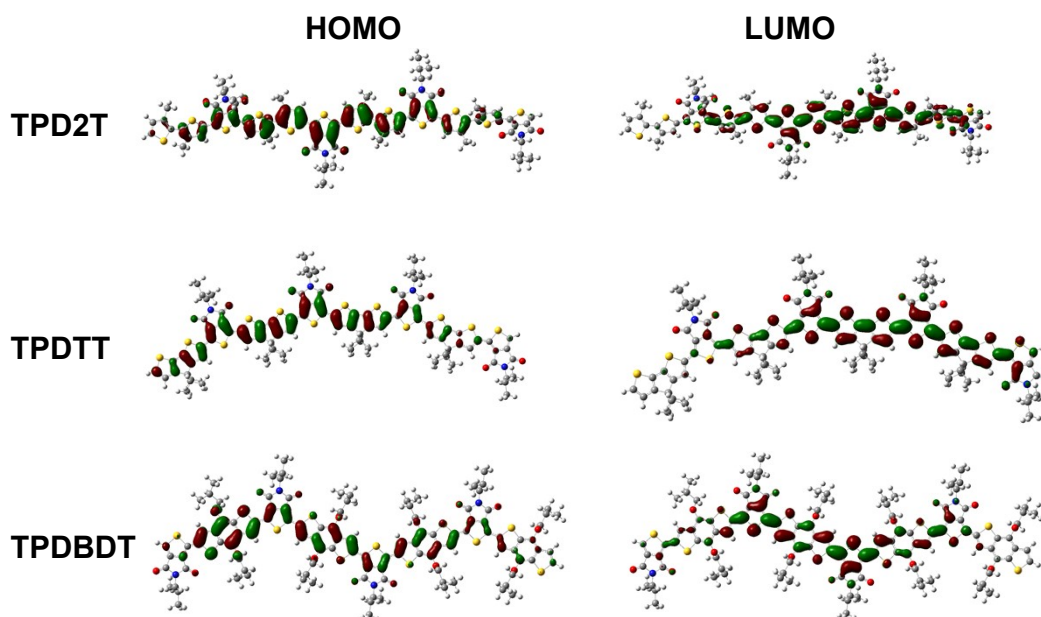

Fig. S9. The HOMO and LUMO of TPD2T, TPD2T NPs, TPD2T NPs.

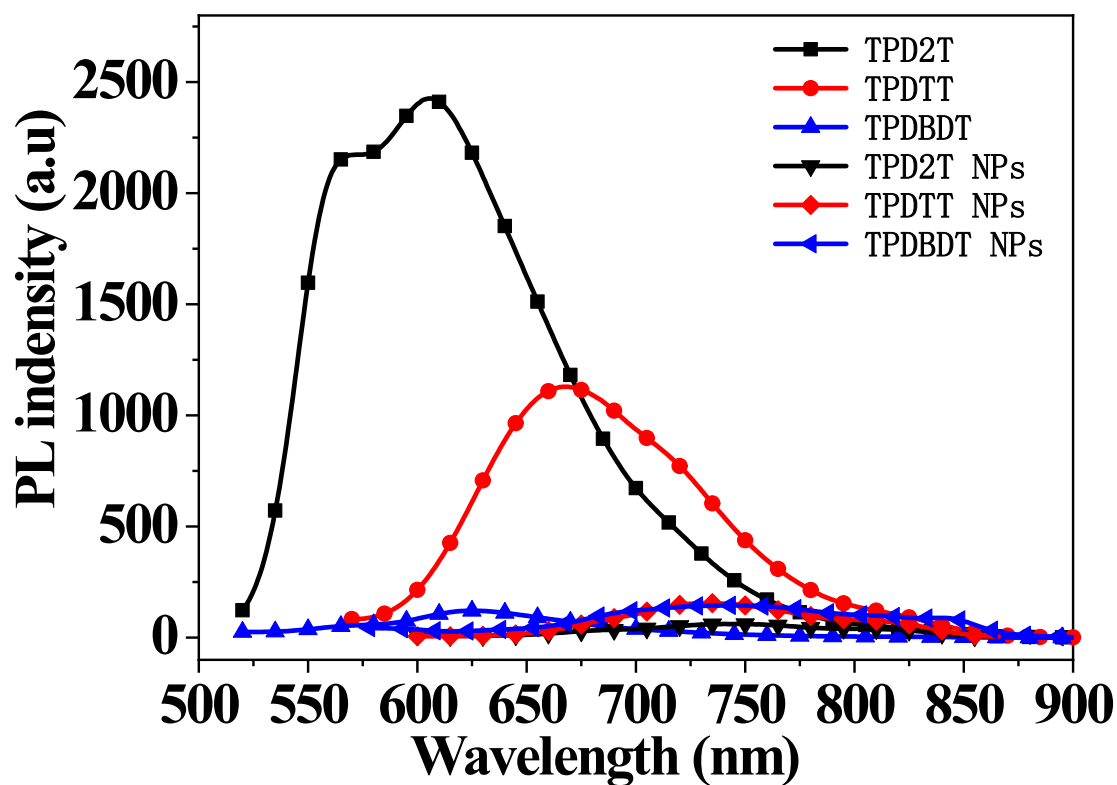

Fig. S10. PL spectra of TPD2T, TPD2T NPs, TPD2T NPs, TPD2T NPs, and TPD2T NPs.

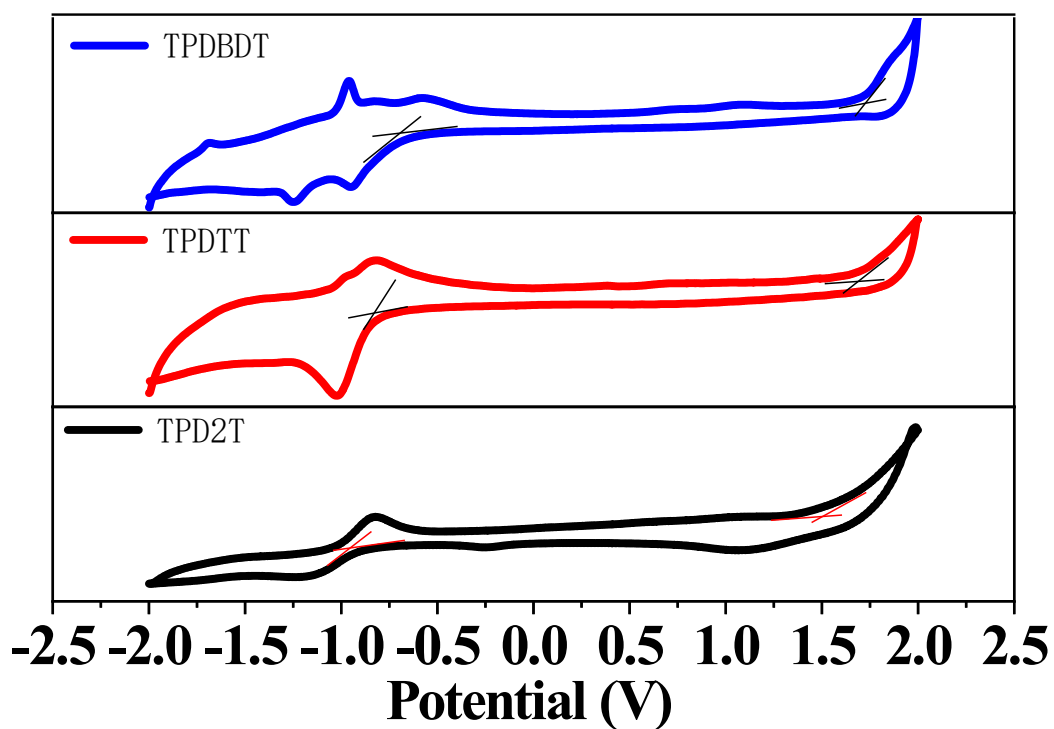

**Fig. S11.** The CV curves of polymers TPD2T, TPDTT, and TPDBDT.

**Table S2.** Fitted decay time of TPD2T, TPDTT, and TPDBDT

| paramters        | TPD2T  | TPDTT  | TPDBDT |
|------------------|--------|--------|--------|
| $\lambda$        | 520    | 540    | 520    |
| $\tau_1$ (ns)    | 0.487  | 0.685  | 0.622  |
| $B_1$            | 21.15% | 62.33% | 78.77% |
| $\tau_2$ (ns)    | 2.452  | 2.249  | 2.158  |
| $B_2$            | 78.85% | 37.67% | 21.23% |
| $\tau_{Av}$ (ns) | 2.04   | 1.27   | 0.95   |
| $\chi^2$         | 1.117  | 1.196  | 1.177  |

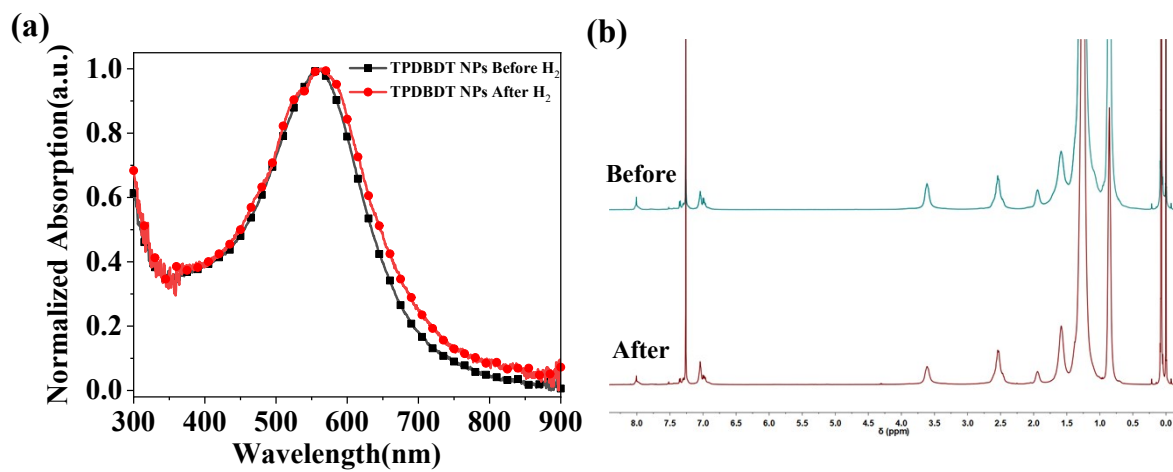

Fig. S12. (a) UV-vis spectra and (b) <sup>1</sup>H NMR of TPDBDT NPs after H<sub>2</sub> production

**Table S3.** Summary of the photocatalytic hydrogen production performances of organic photocatalysts.

| Polymer catalyst           | Metal co-Catalyst       | $\lambda$ (nm) | Other conditions          | HER (mmol $\text{h}^{-1} \cdot \text{g}^{-1}$ ) | AQY           | Ref.      |
|----------------------------|-------------------------|----------------|---------------------------|-------------------------------------------------|---------------|-----------|
| PFODTBT <sup>a</sup>       | 0.1 wt% Pd residue      | >550           | AA/H <sub>2</sub> O       | 50                                              | 0.6%@550 nm   | 8         |
| PBDT-B3T <sup>a</sup>      | 4 wt% Pt                | >420           | AA/H <sub>2</sub> O       | 14.1                                            | 0.5%@420 nm   | 9         |
| PFBT <sup>a</sup>          | --                      | >420           | AA/H <sub>2</sub> O       | 8.3                                             | 0.5%@420 nm   | 10        |
| PG6 <sup>a</sup>           | 4 wt % Pt               | >420           | AA/H <sub>2</sub> O       | 5.84                                            | 0.7%@420 nm   | 11        |
| PFTBTA <sup>a</sup>        | Pd residue              | >420           | DEA/H <sub>2</sub> O      | 0.44                                            | 0.56%@420 nm  | 12        |
| PFTBTA <sup>a</sup>        | Pd residue              | >420           | TEA/H <sub>2</sub> O      | 1.05                                            | --            | 13        |
| PFTBDD <sup>a</sup>        | Pd residue              | >420           | AA/H <sub>2</sub> O       | 0.02                                            | 0.56%@420 nm  | 14        |
| LE-CP-dots <sup>a</sup>    | --                      | >420           | AA/H <sub>2</sub> O       | 0.77                                            | --            | 15        |
| PyPm <sup>a</sup>          | 3 wt% Pt                | >300           | TEOA/H <sub>2</sub> O     | 0.37                                            | 1.1%@420 nm   | 16        |
| PFTFQ-PtPy15 <sup>b</sup>  | --                      | >420           | DEA/H <sub>2</sub> O      | 12.7                                            | 0.4%@515 nm   | 17        |
| PFTBTA-PtPy <sup>b</sup>   | 2.3 wt% Pt + Pd residue | >420           | TEA/H <sub>2</sub> O      | 7.34                                            | 0.27%@420 nm  | 13        |
| PFTBDD-Ir-TPy <sup>b</sup> | -                       | >420           | AA/H <sub>2</sub> O       | 0.44                                            | --            | 14        |
| FP-R <sup>c</sup>          | --                      | >420           | TEA/MeOH/H <sub>2</sub> O | 2.9                                             | 10.0%@420 nm  | 18        |
| PBDTBT-7EO <sup>c</sup>    | 3wt.% Pt                | >420           | AA/H <sub>2</sub> O       | 12.8                                            | 0.25% @550 nm | 19        |
| PFN-Br <sup>d</sup>        | 3 wt% Pt                | >420           | AA/TEOA/H <sub>2</sub> O  | 0.08                                            | 0.12@550 nm   | 20        |
| PFBT-CPE <sup>d</sup>      | 0.04 wt% Pd             | >420           | TEA/MeOH/H <sub>2</sub> O | 5.12                                            | 0.3% @420 nm  | 21        |
| PSO-FBBr <sup>d</sup>      | 0.15 wt% Pt             | >420           | TEOA/H <sub>2</sub> O     | 20.5                                            | 3.5% @420 nm  | 22        |
| TPDBDT NPs <sup>a</sup>    | --                      | >300           | AA/H <sub>2</sub> O       | 7.42                                            | 0.55%@550 nm  | This work |
| TPD2T NPs <sup>a</sup>     | --                      | >300           | AA/H <sub>2</sub> O       | 0.38                                            | --            | This work |
| TPD TT NPs <sup>a</sup>    | --                      | >300           | AA/H <sub>2</sub> O       | 0.81                                            | --            | This work |

<sup>a</sup> organic nanoparticles (NPs). <sup>b</sup> metal complex-contained polymer nanoparticles(NPs). <sup>c</sup> OEG-functionalized conjugated polymers. <sup>d</sup> Conjugated Polyelectrolyte. AA: ascorbic acid, DEA: diethylamine, TEOA: triethanolamine, and TEA: trimethylamine.

## The TPD2T optimized geometries of the stationary points

Stand orientation

| Center<br>Number | Atomic<br>Number | Atomic<br>Type | Coordinates (Angstroms) |           |           |
|------------------|------------------|----------------|-------------------------|-----------|-----------|
|                  |                  |                | X                       | Y         | Z         |
| 1                | 6                | 0              | 18.846772               | 0.558603  | 0.233428  |
| 2                | 6                | 0              | 19.440102               | -0.666705 | 0.610893  |
| 3                | 6                | 0              | 20.829473               | -0.583931 | 0.679659  |
| 4                | 6                | 0              | 21.313004               | 0.679091  | 0.374952  |
| 5                | 16               | 0              | 20.056803               | 1.658699  | 0.046291  |
| 6                | 6                | 0              | 19.047752               | -2.015745 | 0.957189  |
| 7                | 7                | 0              | 20.281467               | -2.672561 | 1.209515  |
| 8                | 6                | 0              | 21.416214               | -1.845493 | 1.053005  |
| 9                | 8                | 0              | 22.579063               | -2.18321  | 1.211275  |
| 10               | 8                | 0              | 17.965808               | -2.576475 | 1.055288  |
| 11               | 6                | 0              | 20.360501               | -4.081185 | 1.581178  |
| 12               | 6                | 0              | 20.176761               | -5.038472 | 0.387152  |
| 13               | 6                | 0              | 21.255917               | -4.828424 | -0.686349 |
| 14               | 6                | 0              | 20.184998               | -6.496296 | 0.873132  |
| 15               | 6                | 0              | 11.135785               | 0.716039  | -0.117676 |
| 16               | 6                | 0              | 11.629187               | -0.5847   | 0.112734  |
| 17               | 6                | 0              | 13.020333               | -0.66235  | 0.118348  |
| 18               | 6                | 0              | 13.612776               | 0.60807   | -0.103934 |
| 19               | 16               | 0              | 12.413971               | 1.696249  | -0.359078 |
| 20               | 6                | 0              | 17.471711               | 0.922044  | 0.022944  |
| 21               | 6                | 0              | 16.982829               | 2.19643   | -0.32855  |
| 22               | 6                | 0              | 15.594306               | 2.250429  | -0.438824 |
| 23               | 6                | 0              | 15.000159               | 0.99418   | -0.152379 |
| 24               | 16               | 0              | 16.199649               | -0.090005 | 0.118029  |
| 25               | 6                | 0              | 14.953052               | 3.525727  | -0.938165 |
| 26               | 6                | 0              | 13.672375               | -2.022936 | 0.222361  |
| 27               | 6                | 0              | 7.247911                | 0.971608  | -0.165384 |
| 28               | 6                | 0              | 7.733767                | 2.282154  | -0.346258 |
| 29               | 6                | 0              | 9.131067                | 2.356985  | -0.341064 |
| 30               | 6                | 0              | 9.754437                | 1.106903  | -0.163157 |
| 31               | 16               | 0              | 8.556989                | -0.001617 | 0.014243  |
| 32               | 6                | 0              | 7.177387                | 3.598907  | -0.548715 |
| 33               | 7                | 0              | 8.320978                | 4.419593  | -0.658953 |
| 34               | 6                | 0              | 9.545758                | 3.727738  | -0.52349  |
| 35               | 8                | 0              | 10.638903               | 4.277725  | -0.5589   |
| 36               | 8                | 0              | 6.03353                 | 4.03089   | -0.62428  |
| 37               | 6                | 0              | 8.233899                | 5.862265  | -0.860592 |

|    |    |   |            |           |           |
|----|----|---|------------|-----------|-----------|
| 38 | 6  | 0 | 7.918496   | 6.645236  | 0.429347  |
| 39 | 6  | 0 | 8.995463   | 6.443238  | 1.506571  |
| 40 | 6  | 0 | 7.759159   | 8.140547  | 0.112107  |
| 41 | 6  | 0 | -0.403006  | -0.092577 | -0.335508 |
| 42 | 6  | 0 | -0.045616  | 1.260007  | -0.478038 |
| 43 | 6  | 0 | 1.326732   | 1.494514  | -0.442707 |
| 44 | 6  | 0 | 2.046132   | 0.280653  | -0.260675 |
| 45 | 16 | 0 | 0.976754   | -0.950976 | -0.159997 |
| 46 | 6  | 0 | 5.915453   | 0.434449  | -0.12477  |
| 47 | 6  | 0 | 5.565169   | -0.919862 | 0.036732  |
| 48 | 6  | 0 | 4.189899   | -1.147291 | 0.008662  |
| 49 | 6  | 0 | 3.472528   | 0.066715  | -0.171012 |
| 50 | 16 | 0 | 4.542092   | 1.299225  | -0.272684 |
| 51 | 6  | 0 | 3.643956   | -2.548416 | 0.161743  |
| 52 | 6  | 0 | 1.868895   | 2.897978  | -0.590686 |
| 53 | 6  | 0 | -4.235844  | -0.813464 | -0.401037 |
| 54 | 6  | 0 | -3.596605  | -2.063619 | -0.262251 |
| 55 | 6  | 0 | -2.201683  | -1.970429 | -0.242684 |
| 56 | 6  | 0 | -1.724746  | -0.648032 | -0.35683  |
| 57 | 16 | 0 | -3.04776   | 0.30844   | -0.537721 |
| 58 | 6  | 0 | -4.001323  | -3.441536 | -0.119387 |
| 59 | 7  | 0 | -2.772241  | -4.128208 | -0.018213 |
| 60 | 6  | 0 | -1.637219  | -3.292375 | -0.100357 |
| 61 | 8  | 0 | -0.486789  | -3.71149  | -0.060425 |
| 62 | 8  | 0 | -5.088194  | -4.005868 | -0.083111 |
| 63 | 6  | 0 | -2.6928    | -5.578589 | 0.120648  |
| 64 | 6  | 0 | -2.908047  | -6.334459 | -1.205657 |
| 65 | 6  | 0 | -1.857406  | -5.958578 | -2.262016 |
| 66 | 6  | 0 | -2.892199  | -7.850942 | -0.95684  |
| 67 | 6  | 0 | -11.947439 | -0.625865 | -0.144729 |
| 68 | 6  | 0 | -11.447115 | -1.93849  | -0.049576 |
| 69 | 6  | 0 | -10.056313 | -2.011747 | -0.118985 |
| 70 | 6  | 0 | -9.481553  | -0.720861 | -0.273572 |
| 71 | 16 | 0 | -10.683337 | 0.386697  | -0.325324 |
| 72 | 6  | 0 | -5.620545  | -0.431397 | -0.433256 |
| 73 | 6  | 0 | -6.122713  | 0.876609  | -0.571725 |
| 74 | 6  | 0 | -7.515085  | 0.945664  | -0.539004 |
| 75 | 6  | 0 | -8.089104  | -0.344358 | -0.373326 |
| 76 | 16 | 0 | -6.886167  | -1.449208 | -0.297191 |
| 77 | 6  | 0 | -8.21572   | 2.279328  | -0.665481 |
| 78 | 6  | 0 | -9.356643  | -3.348611 | -0.026357 |
| 79 | 6  | 0 | -15.835139 | -0.374223 | 0.107458  |
| 80 | 6  | 0 | -15.356916 | 0.943866  | -0.045744 |
| 81 | 6  | 0 | -13.96513  | 1.023411  | -0.157743 |

|     |    |   |            |           |           |
|-----|----|---|------------|-----------|-----------|
| 82  | 6  | 0 | -13.328884 | -0.233673 | -0.088658 |
| 83  | 16 | 0 | -14.514753 | -1.350996 | 0.095864  |
| 84  | 6  | 0 | -15.91662  | 2.273312  | -0.117634 |
| 85  | 7  | 0 | -14.784858 | 3.100257  | -0.279743 |
| 86  | 6  | 0 | -13.55849  | 2.40008   | -0.30813  |
| 87  | 8  | 0 | -12.471173 | 2.950325  | -0.432368 |
| 88  | 8  | 0 | -17.060476 | 2.709331  | -0.062491 |
| 89  | 6  | 0 | -14.882283 | 4.552941  | -0.375884 |
| 90  | 6  | 0 | -15.066117 | 5.245476  | 0.989211  |
| 91  | 6  | 0 | -13.892304 | 4.96815   | 1.941205  |
| 92  | 6  | 0 | -15.243961 | 6.759351  | 0.792938  |
| 93  | 6  | 0 | -23.444408 | -1.334797 | 0.763735  |
| 94  | 6  | 0 | -23.126171 | 0.010593  | 0.619311  |
| 95  | 6  | 0 | -21.74036  | 0.204754  | 0.498022  |
| 96  | 6  | 0 | -21.032544 | -1.023568 | 0.555263  |
| 97  | 16 | 0 | -22.110637 | -2.246223 | 0.745579  |
| 98  | 6  | 0 | -17.15558  | -0.912643 | 0.254912  |
| 99  | 6  | 0 | -17.512611 | -2.263423 | 0.404007  |
| 100 | 6  | 0 | -18.883162 | -2.481169 | 0.525859  |
| 101 | 6  | 0 | -19.605425 | -1.256208 | 0.469432  |
| 102 | 16 | 0 | -18.535672 | -0.035693 | 0.279618  |
| 103 | 6  | 0 | -19.417159 | -3.885581 | 0.692453  |
| 104 | 6  | 0 | -21.186846 | 1.60241   | 0.33132   |
| 105 | 1  | 0 | 22.357289  | 0.983864  | 0.362174  |
| 106 | 1  | 0 | 19.590359  | -4.290055 | 2.345533  |
| 107 | 1  | 0 | 21.328594  | -4.284783 | 2.070033  |
| 108 | 1  | 0 | 19.189005  | -4.842437 | -0.075463 |
| 109 | 1  | 0 | 21.125333  | -5.537706 | -1.522719 |
| 110 | 1  | 0 | 21.213715  | -3.812337 | -1.115007 |
| 111 | 1  | 0 | 22.267589  | -4.978668 | -0.269688 |
| 112 | 1  | 0 | 20.016231  | -7.196778 | 0.036686  |
| 113 | 1  | 0 | 19.389941  | -6.676156 | 1.619065  |
| 114 | 1  | 0 | 21.152139  | -6.75586  | 1.340701  |
| 115 | 1  | 0 | 11.00478   | -1.466541 | 0.26862   |
| 116 | 1  | 0 | 17.608645  | 3.073046  | -0.506968 |
| 117 | 1  | 0 | 15.686749  | 4.127891  | -1.503126 |
| 118 | 1  | 0 | 14.157022  | 3.320926  | -1.669815 |
| 119 | 1  | 0 | 14.603759  | 4.175708  | -0.118896 |
| 120 | 1  | 0 | 12.961861  | -2.813678 | -0.077353 |
| 121 | 1  | 0 | 14.505349  | -2.129723 | -0.488726 |
| 122 | 1  | 0 | 13.974783  | -2.27154  | 1.253135  |
| 123 | 1  | 0 | 7.452928   | 6.066782  | -1.614989 |
| 124 | 1  | 0 | 9.171665   | 6.239895  | -1.30219  |
| 125 | 1  | 0 | 6.954056   | 6.280975  | 0.836126  |



|     |   |   |            |           |           |
|-----|---|---|------------|-----------|-----------|
| 126 | 1 | 0 | 8.764129   | 7.03244   | 2.411731  |
| 127 | 1 | 0 | 9.068078   | 5.387576  | 1.819709  |
| 128 | 1 | 0 | 9.98885    | 6.758868  | 1.142304  |
| 129 | 1 | 0 | 7.49214    | 8.714325  | 1.016706  |
| 130 | 1 | 0 | 6.961713   | 8.311165  | -0.633483 |
| 131 | 1 | 0 | 8.696173   | 8.564889  | -0.29212  |
| 132 | 1 | 0 | -0.737137  | 2.086325  | -0.628246 |
| 133 | 1 | 0 | 6.277959   | -1.7371   | 0.161387  |
| 134 | 1 | 0 | 4.46117    | -3.275692 | 0.307209  |
| 135 | 1 | 0 | 2.990972   | -2.63963  | 1.045907  |
| 136 | 1 | 0 | 3.096265   | -2.875488 | -0.738195 |
| 137 | 1 | 0 | 1.049288   | 3.629061  | -0.699297 |
| 138 | 1 | 0 | 2.443044   | 3.21239   | 0.297009  |
| 139 | 1 | 0 | 2.495445   | 3.002513  | -1.492571 |
| 140 | 1 | 0 | -3.449015  | -5.904851 | 0.85722   |
| 141 | 1 | 0 | -1.719928  | -5.864911 | 0.554719  |
| 142 | 1 | 0 | -3.906637  | -6.068305 | -1.605896 |
| 143 | 1 | 0 | -2.013401  | -6.528928 | -3.194854 |
| 144 | 1 | 0 | -1.908041  | -4.88846  | -2.526689 |
| 145 | 1 | 0 | -0.83541   | -6.171522 | -1.902145 |
| 146 | 1 | 0 | -3.085811  | -8.410397 | -1.888764 |
| 147 | 1 | 0 | -3.667494  | -8.147333 | -0.227564 |
| 148 | 1 | 0 | -1.913694  | -8.180618 | -0.562763 |
| 149 | 1 | 0 | -12.062242 | -2.831399 | 0.075464  |
| 150 | 1 | 0 | -5.507285  | 1.771085  | -0.683407 |
| 151 | 1 | 0 | -7.485393  | 3.095945  | -0.798843 |
| 152 | 1 | 0 | -8.878007  | 2.313765  | -1.546839 |
| 153 | 1 | 0 | -8.792767  | 2.527885  | 0.241119  |
| 154 | 1 | 0 | -10.087898 | -4.168934 | 0.075481  |
| 155 | 1 | 0 | -8.771914  | -3.570178 | -0.9351   |
| 156 | 1 | 0 | -8.701447  | -3.408807 | 0.858982  |
| 157 | 1 | 0 | -15.731165 | 4.808281  | -1.035391 |
| 158 | 1 | 0 | -13.989149 | 4.960222  | -0.879202 |
| 159 | 1 | 0 | -15.989699 | 4.854822  | 1.461136  |
| 160 | 1 | 0 | -14.030177 | 5.494399  | 2.902503  |
| 161 | 1 | 0 | -13.798614 | 3.893448  | 2.17354   |
| 162 | 1 | 0 | -12.93585  | 5.305976  | 1.504894  |
| 163 | 1 | 0 | -15.418632 | 7.269006  | 1.756623  |
| 164 | 1 | 0 | -16.107881 | 6.982009  | 0.14116   |
| 165 | 1 | 0 | -14.34678  | 7.21001   | 0.331006  |
| 166 | 1 | 0 | -24.450742 | -1.738084 | 0.875366  |
| 167 | 1 | 0 | -23.867601 | 0.809838  | 0.603202  |
| 168 | 1 | 0 | -16.821628 | -3.103419 | 0.429256  |
| 169 | 1 | 0 | -18.597039 | -4.623978 | 0.697684  |

|     |   |   |            |           |           |
|-----|---|---|------------|-----------|-----------|
| 170 | 1 | 0 | -19.947042 | -4.01071  | 1.652422  |
| 171 | 1 | 0 | -20.081252 | -4.172455 | -0.140956 |
| 172 | 1 | 0 | -22.002183 | 2.346434  | 0.325866  |
| 173 | 1 | 0 | -20.520571 | 1.884328  | 1.164088  |
| 174 | 1 | 0 | -20.654896 | 1.723867  | -0.627403 |

---

### The TPDTT optimized geometries of the stationary points

Stand orientation

---

| Center<br>Number | Atomic<br>Number | Atomic<br>Type | Coordinates (Angstroms) |           |           |
|------------------|------------------|----------------|-------------------------|-----------|-----------|
|                  |                  |                | X                       | Y         | Z         |
| 1                | 6                | 0              | 18.953037               | -1.489818 | -0.281879 |
| 2                | 6                | 0              | 19.729797               | -2.626283 | -0.129924 |
| 3                | 6                | 0              | 21.131683               | -2.384574 | -0.191407 |
| 4                | 6                | 0              | 21.475002               | -1.084772 | -0.389822 |
| 5                | 16               | 0              | 20.039164               | -0.105499 | -0.510947 |
| 6                | 6                | 0              | 19.531311               | -4.074875 | 0.095385  |
| 7                | 7                | 0              | 20.826849               | -4.624025 | 0.171298  |
| 8                | 6                | 0              | 21.8499                 | -3.671172 | -0.007698 |
| 9                | 8                | 0              | 23.040764               | -3.910563 | -0.006761 |
| 10               | 8                | 0              | 18.509541               | -4.737652 | 0.197372  |
| 11               | 6                | 0              | 21.075247               | -6.04978  | 0.356479  |
| 12               | 6                | 0              | 20.914208               | -6.536023 | 1.810217  |
| 13               | 6                | 0              | 21.09464                | -8.060203 | 1.852243  |
| 14               | 6                | 0              | 21.884117               | -5.832437 | 2.7681    |
| 15               | 6                | 0              | 15.203478               | -0.442665 | -0.313081 |
| 16               | 16               | 0              | 16.772207               | 0.272605  | -0.40375  |
| 17               | 6                | 0              | 17.524143               | -1.327915 | -0.277755 |
| 18               | 6                | 0              | 16.564415               | -2.331278 | -0.173777 |
| 19               | 6                | 0              | 15.250844               | -1.828223 | -0.182038 |
| 20               | 6                | 0              | 13.838127               | -2.417656 | -0.129602 |
| 21               | 6                | 0              | 13.013828               | -1.132147 | -0.248505 |
| 22               | 6                | 0              | 13.83941                | -0.014087 | -0.352803 |
| 23               | 6                | 0              | 11.654887               | -0.780915 | -0.230562 |
| 24               | 6                | 0              | 11.437399               | 0.593611  | -0.340789 |
| 25               | 16               | 0              | 12.973942               | 1.47538   | -0.453759 |
| 26               | 6                | 0              | 13.637085               | -3.36917  | -1.34713  |
| 27               | 6                | 0              | 13.532871               | -3.10147  | 1.237117  |
| 28               | 6                | 0              | 14.309797               | -4.387659 | 1.538305  |
| 29               | 6                | 0              | 12.250597               | -4.006527 | -1.484874 |
| 30               | 6                | 0              | 7.602001                | 1.69475   | -0.357833 |

|    |    |   |           |           |           |
|----|----|---|-----------|-----------|-----------|
| 31 | 6  | 0 | 8.392878  | 2.822518  | -0.443904 |
| 32 | 6  | 0 | 9.793766  | 2.581622  | -0.4499   |
| 33 | 6  | 0 | 10.163364 | 1.254799  | -0.367375 |
| 34 | 16 | 0 | 8.678188  | 0.281706  | -0.280016 |
| 35 | 6  | 0 | 8.175046  | 4.280969  | -0.538959 |
| 36 | 7  | 0 | 9.462223  | 4.846148  | -0.586036 |
| 37 | 6  | 0 | 10.487645 | 3.882932  | -0.550854 |
| 38 | 8  | 0 | 11.679806 | 4.136227  | -0.602816 |
| 39 | 8  | 0 | 7.138833  | 4.923815  | -0.578692 |
| 40 | 6  | 0 | 9.69864   | 6.280371  | -0.714506 |
| 41 | 6  | 0 | 9.523356  | 7.068614  | 0.598316  |
| 42 | 6  | 0 | 10.49622  | 6.602621  | 1.689012  |
| 43 | 6  | 0 | 9.684804  | 8.567743  | 0.308678  |
| 44 | 6  | 0 | 3.713306  | 1.728384  | -0.291938 |
| 45 | 16 | 0 | 5.026498  | 2.844224  | -0.382158 |
| 46 | 6  | 0 | 6.18101   | 1.496918  | -0.32596  |
| 47 | 6  | 0 | 5.517252  | 0.271028  | -0.245239 |
| 48 | 6  | 0 | 4.120249  | 0.397407  | -0.213383 |
| 49 | 6  | 0 | 2.913842  | -0.545791 | -0.170719 |
| 50 | 6  | 0 | 1.779927  | 0.482099  | -0.238116 |
| 51 | 6  | 0 | 2.283009  | 1.780163  | -0.305441 |
| 52 | 6  | 0 | 0.377292  | 0.462254  | -0.197332 |
| 53 | 6  | 0 | -0.194711 | 1.73468   | -0.254018 |
| 54 | 16 | 0 | 1.05489   | 2.9921    | -0.343312 |
| 55 | 6  | 0 | 2.949025  | -1.477903 | -1.418569 |
| 56 | 6  | 0 | 2.815789  | -1.32716  | 1.173621  |
| 57 | 6  | 0 | 3.914269  | -2.362208 | 1.437476  |
| 58 | 6  | 0 | 1.776032  | -2.45201  | -1.569688 |
| 59 | 6  | 0 | -4.18495  | 1.786616  | -0.211054 |
| 60 | 6  | 0 | -3.719498 | 3.08538   | -0.248499 |
| 61 | 6  | 0 | -2.304799 | 3.22226   | -0.269866 |
| 62 | 6  | 0 | -1.597947 | 2.037483  | -0.248014 |
| 63 | 16 | 0 | -2.773929 | 0.70469   | -0.201025 |
| 64 | 6  | 0 | -4.314448 | 4.437818  | -0.276001 |
| 65 | 7  | 0 | -3.222118 | 5.323317  | -0.301063 |
| 66 | 6  | 0 | -1.978933 | 4.663445  | -0.313707 |
| 67 | 8  | 0 | -0.896452 | 5.223652  | -0.358667 |
| 68 | 8  | 0 | -5.483794 | 4.78614   | -0.283012 |
| 69 | 6  | 0 | -3.372494 | 6.773327  | -0.3657   |
| 70 | 6  | 0 | -3.728673 | 7.431144  | 0.98186   |
| 71 | 6  | 0 | -2.651457 | 7.190878  | 2.047285  |
| 72 | 6  | 0 | -3.970208 | 8.931015  | 0.759553  |
| 73 | 6  | 0 | -7.944597 | 0.792711  | -0.133869 |
| 74 | 16 | 0 | -6.972148 | 2.217615  | -0.174748 |

|     |    |   |            |           |           |
|-----|----|---|------------|-----------|-----------|
| 75  | 6  | 0 | -5.503264  | 1.220566  | -0.184225 |
| 76  | 6  | 0 | -5.820546  | -0.139089 | -0.159302 |
| 77  | 6  | 0 | -7.201062  | -0.386348 | -0.118622 |
| 78  | 6  | 0 | -8.116749  | -1.614559 | -0.118709 |
| 79  | 6  | 0 | -9.48171   | -0.919221 | -0.135324 |
| 80  | 6  | 0 | -9.338414  | 0.466871  | -0.142288 |
| 81  | 6  | 0 | -10.829324 | -1.309642 | -0.093737 |
| 82  | 6  | 0 | -11.71637  | -0.231714 | -0.090058 |
| 83  | 16 | 0 | -10.842766 | 1.313019  | -0.121835 |
| 84  | 6  | 0 | -7.855873  | -2.446427 | -1.409873 |
| 85  | 6  | 0 | -7.987171  | -2.454794 | 1.186811  |
| 86  | 6  | 0 | -6.651864  | -3.175632 | 1.398939  |
| 87  | 6  | 0 | -8.734802  | -3.68598  | -1.606287 |
| 88  | 6  | 0 | -15.579169 | -1.236634 | -0.040344 |
| 89  | 6  | 0 | -15.473208 | 0.139277  | -0.019685 |
| 90  | 6  | 0 | -14.144021 | 0.645591  | -0.036062 |
| 91  | 6  | 0 | -13.15003  | -0.309821 | -0.0685   |
| 92  | 16 | 0 | -13.932703 | -1.906799 | -0.080745 |
| 93  | 6  | 0 | -16.403089 | 1.286106  | 0.014829  |
| 94  | 7  | 0 | -15.582627 | 2.429008  | 0.029635  |
| 95  | 6  | 0 | -14.209778 | 2.121818  | -0.014166 |
| 96  | 8  | 0 | -13.314011 | 2.949676  | -0.03394  |
| 97  | 8  | 0 | -17.623211 | 1.315777  | 0.024292  |
| 98  | 6  | 0 | -16.110098 | 3.789144  | 0.031931  |
| 99  | 6  | 0 | -16.607891 | 4.270369  | 1.409     |
| 100 | 6  | 0 | -15.490847 | 4.274931  | 2.460385  |
| 101 | 6  | 0 | -17.237675 | 5.662324  | 1.256728  |
| 102 | 6  | 0 | -18.942625 | -3.190343 | -0.005737 |
| 103 | 16 | 0 | -18.381377 | -1.560562 | 0.011899  |
| 104 | 6  | 0 | -16.700256 | -2.132472 | -0.037529 |
| 105 | 6  | 0 | -16.64961  | -3.526383 | -0.068308 |
| 106 | 6  | 0 | -17.917461 | -4.130613 | -0.037808 |
| 107 | 6  | 0 | -18.481534 | -5.554535 | -0.089749 |
| 108 | 6  | 0 | -19.982282 | -5.244556 | -0.079175 |
| 109 | 6  | 0 | -20.204289 | -3.876616 | -0.02924  |
| 110 | 6  | 0 | -21.192889 | -5.988714 | -0.054305 |
| 111 | 6  | 0 | -22.299639 | -5.17628  | -0.005143 |
| 112 | 16 | 0 | -21.888047 | -3.479333 | 0.026049  |
| 113 | 6  | 0 | -18.023654 | -6.236937 | -1.413242 |
| 114 | 6  | 0 | -18.123953 | -6.38306  | 1.180159  |
| 115 | 6  | 0 | -16.644474 | -6.736876 | 1.364181  |
| 116 | 6  | 0 | -18.551073 | -7.653786 | -1.662467 |
| 117 | 1  | 0 | 22.455554  | -0.636275 | -0.472241 |
| 118 | 1  | 0 | 22.095428  | -6.231066 | 0.003953  |

|     |   |   |           |           |           |
|-----|---|---|-----------|-----------|-----------|
| 119 | 1 | 0 | 20.378341 | -6.590202 | -0.292291 |
| 120 | 1 | 0 | 19.885673 | -6.303579 | 2.11686   |
| 121 | 1 | 0 | 20.942998 | -8.442175 | 2.867868  |
| 122 | 1 | 0 | 20.381174 | -8.569177 | 1.193192  |
| 123 | 1 | 0 | 22.10681  | -8.346568 | 1.538102  |
| 124 | 1 | 0 | 21.743142 | -6.193853 | 3.793287  |
| 125 | 1 | 0 | 21.732193 | -4.747839 | 2.775828  |
| 126 | 1 | 0 | 22.926694 | -6.019577 | 2.483426  |
| 127 | 1 | 0 | 16.852886 | -3.373767 | -0.098869 |
| 128 | 1 | 0 | 10.837458 | -1.486818 | -0.132784 |
| 129 | 1 | 0 | 14.393754 | -4.160626 | -1.285963 |
| 130 | 1 | 0 | 13.865841 | -2.800718 | -2.256624 |
| 131 | 1 | 0 | 13.726311 | -2.366008 | 2.027362  |
| 132 | 1 | 0 | 12.456756 | -3.312457 | 1.2779    |
| 133 | 1 | 0 | 14.026325 | -4.769175 | 2.525685  |
| 134 | 1 | 0 | 14.099501 | -5.178536 | 0.810159  |
| 135 | 1 | 0 | 15.391478 | -4.221159 | 1.549835  |
| 136 | 1 | 0 | 12.225221 | -4.655693 | -2.367199 |
| 137 | 1 | 0 | 11.467935 | -3.251439 | -1.613837 |
| 138 | 1 | 0 | 11.989306 | -4.623199 | -0.617892 |
| 139 | 1 | 0 | 9.000262  | 6.659252  | -1.467772 |
| 140 | 1 | 0 | 10.718956 | 6.391087  | -1.094536 |
| 141 | 1 | 0 | 8.495965  | 6.894747  | 0.944706  |
| 142 | 1 | 0 | 10.343284 | 7.174652  | 2.61145   |
| 143 | 1 | 0 | 10.359048 | 5.543121  | 1.93024   |
| 144 | 1 | 0 | 11.538142 | 6.739416  | 1.374559  |
| 145 | 1 | 0 | 9.522772  | 9.158898  | 1.216779  |
| 146 | 1 | 0 | 8.968344  | 8.911799  | -0.44668  |
| 147 | 1 | 0 | 10.69507  | 8.792626  | -0.05757  |
| 148 | 1 | 0 | 6.051908  | -0.672161 | -0.218545 |
| 149 | 1 | 0 | -0.224995 | -0.436321 | -0.120358 |
| 150 | 1 | 0 | 3.887218  | -2.046198 | -1.391885 |
| 151 | 1 | 0 | 3.007038  | -0.840594 | -2.308991 |
| 152 | 1 | 0 | 2.809015  | -0.591491 | 1.986723  |
| 153 | 1 | 0 | 1.838093  | -1.823929 | 1.207411  |
| 154 | 1 | 0 | 3.744162  | -2.848301 | 2.404613  |
| 155 | 1 | 0 | 3.935571  | -3.149027 | 0.675365  |
| 156 | 1 | 0 | 4.905828  | -1.899242 | 1.476069  |
| 157 | 1 | 0 | 1.905982  | -3.054591 | -2.47555  |
| 158 | 1 | 0 | 0.821357  | -1.924137 | -1.664212 |
| 159 | 1 | 0 | 1.69965   | -3.144775 | -0.724333 |
| 160 | 1 | 0 | -4.157127 | 6.986975  | -1.098793 |
| 161 | 1 | 0 | -2.42281  | 7.164335  | -0.743789 |
| 162 | 1 | 0 | -4.669281 | 6.978992  | 1.323326  |

|     |   |   |            |           |           |
|-----|---|---|------------|-----------|-----------|
| 163 | 1 | 0 | -2.935174  | 7.66286   | 2.995061  |
| 164 | 1 | 0 | -2.502533  | 6.12324   | 2.240988  |
| 165 | 1 | 0 | -1.686625  | 7.609564  | 1.735949  |
| 166 | 1 | 0 | -4.268167  | 9.419617  | 1.693835  |
| 167 | 1 | 0 | -4.762861  | 9.106741  | 0.022588  |
| 168 | 1 | 0 | -3.059751  | 9.42865   | 0.400743  |
| 169 | 1 | 0 | -5.056538  | -0.90862  | -0.178007 |
| 170 | 1 | 0 | -11.173001 | -2.337607 | -0.058367 |
| 171 | 1 | 0 | -6.801283  | -2.749299 | -1.411913 |
| 172 | 1 | 0 | -7.979255  | -1.775806 | -2.268608 |
| 173 | 1 | 0 | -8.175112  | -1.784606 | 2.034111  |
| 174 | 1 | 0 | -8.799658  | -3.192069 | 1.198706  |
| 175 | 1 | 0 | -6.674283  | -3.732551 | 2.342324  |
| 176 | 1 | 0 | -6.435996  | -3.893943 | 0.600289  |
| 177 | 1 | 0 | -5.816147  | -2.470479 | 1.457172  |
| 178 | 1 | 0 | -8.463605  | -4.191458 | -2.539871 |
| 179 | 1 | 0 | -9.795518  | -3.423084 | -1.674883 |
| 180 | 1 | 0 | -8.61612   | -4.412439 | -0.794761 |
| 181 | 1 | 0 | -16.933661 | 3.820578  | -0.688867 |
| 182 | 1 | 0 | -15.302307 | 4.433029  | -0.329549 |
| 183 | 1 | 0 | -17.391933 | 3.572117  | 1.730822  |
| 184 | 1 | 0 | -15.875146 | 4.614156  | 3.42934   |
| 185 | 1 | 0 | -15.064861 | 3.276315  | 2.604541  |
| 186 | 1 | 0 | -14.673705 | 4.945085  | 2.166679  |
| 187 | 1 | 0 | -17.640914 | 6.01373   | 2.212967  |
| 188 | 1 | 0 | -18.05834  | 5.656128  | 0.529502  |
| 189 | 1 | 0 | -16.494626 | 6.397102  | 0.920159  |
| 190 | 1 | 0 | -15.710409 | -4.066729 | -0.117854 |
| 191 | 1 | 0 | -21.263342 | -7.07053  | -0.06614  |
| 192 | 1 | 0 | -23.340855 | -5.469132 | 0.011824  |
| 193 | 1 | 0 | -16.926559 | -6.254357 | -1.426065 |
| 194 | 1 | 0 | -18.325268 | -5.587463 | -2.243676 |
| 195 | 1 | 0 | -18.47241  | -5.819497 | 2.053885  |
| 196 | 1 | 0 | -18.714906 | -7.307377 | 1.161195  |
| 197 | 1 | 0 | -16.510584 | -7.316485 | 2.284465  |
| 198 | 1 | 0 | -16.256064 | -7.341957 | 0.537451  |
| 199 | 1 | 0 | -16.022015 | -5.840117 | 1.450683  |
| 200 | 1 | 0 | -18.16733  | -8.032848 | -2.616329 |
| 201 | 1 | 0 | -19.644296 | -7.673939 | -1.719556 |
| 202 | 1 | 0 | -18.238729 | -8.356625 | -0.882128 |

---

**The TPDBDT optimized geometries of the stationary points**

## Stand orientation

| Center<br>Number | Atomic<br>Number | Atomic<br>Type | Coordinates (Angstroms) |          |          |
|------------------|------------------|----------------|-------------------------|----------|----------|
|                  |                  |                | X                       | Y        | Z        |
| 1                | 6                | 0              | -20.86846               | -1.85924 | -0.51446 |
| 2                | 6                | 0              | -22.28966               | -1.82569 | -0.57767 |
| 3                | 6                | 0              | -22.82679               | -0.57639 | -0.57757 |
| 4                | 16               | 0              | -21.55842               | 0.61182  | -0.49523 |
| 5                | 6                | 0              | -20.2763                | -0.6106  | -0.46461 |
| 6                | 6                | 0              | -20.44974               | -3.28039 | -0.52909 |
| 7                | 7                | 0              | -21.64444               | -4.022   | -0.61518 |
| 8                | 6                | 0              | -22.80217               | -3.21834 | -0.63305 |
| 9                | 6                | 0              | -21.67372               | -5.48097 | -0.62211 |
| 10               | 6                | 0              | -21.32398               | -6.1133  | -1.98348 |
| 11               | 6                | 0              | -21.28303               | -7.64059 | -1.83138 |
| 12               | 6                | 0              | -22.29963               | -5.6883  | -3.08839 |
| 13               | 8                | 0              | -19.34079               | -3.78774 | -0.47246 |
| 14               | 8                | 0              | -23.94344               | -3.63122 | -0.67916 |
| 15               | 6                | 0              | -16.37383               | -0.20008 | -0.28946 |
| 16               | 6                | 0              | -15.00212               | -0.39395 | -0.22416 |
| 17               | 6                | 0              | -14.19034               | 0.75457  | -0.1452  |
| 18               | 6                | 0              | -14.76141               | 2.06566  | -0.14492 |
| 19               | 6                | 0              | -16.14725               | 2.25483  | -0.2108  |
| 20               | 6                | 0              | -16.9588                | 1.09859  | -0.28287 |
| 21               | 6                | 0              | -12.76834               | 0.78776  | -0.07673 |
| 22               | 6                | 0              | -12.2353                | 2.05399  | -0.05146 |
| 23               | 16               | 0              | -13.49796               | 3.29848  | -0.10605 |
| 24               | 6                | 0              | -18.38428               | 1.04998  | -0.34983 |
| 25               | 6                | 0              | -18.88669               | -0.22698 | -0.39628 |
| 26               | 16               | 0              | -17.60021               | -1.45461 | -0.35097 |
| 27               | 8                | 0              | -14.44136               | -1.64855 | -0.19841 |
| 28               | 8                | 0              | -16.80236               | 3.44662  | -0.25885 |
| 29               | 6                | 0              | -16.34901               | 4.55667  | 0.53986  |
| 30               | 6                | 0              | -17.49738               | 5.55496  | 0.68976  |
| 31               | 6                | 0              | -18.68093               | 4.96789  | 1.4695   |
| 32               | 6                | 0              | -16.968                 | 6.83665  | 1.35169  |
| 33               | 6                | 0              | -14.1912                | -2.23428 | -1.49525 |
| 34               | 6                | 0              | -13.55186               | -3.60669 | -1.29731 |
| 35               | 6                | 0              | -14.47344               | -4.55328 | -0.517   |
| 36               | 6                | 0              | -13.15836               | -4.19448 | -2.66052 |
| 37               | 6                | 0              | -8.73168                | 3.46507  | 0.1198   |
| 38               | 6                | 0              | -10.1478                | 3.58009  | 0.05895  |
| 39               | 6                | 0              | -10.83141               | 2.38289  | 0.0167   |

|    |    |   |           |          |          |
|----|----|---|-----------|----------|----------|
| 40 | 16 | 0 | -9.64109  | 1.07147  | 0.06172  |
| 41 | 6  | 0 | -8.25796  | 2.16731  | 0.12421  |
| 42 | 6  | 0 | -8.15628  | 4.83006  | 0.13387  |
| 43 | 7  | 0 | -9.26059  | 5.69685  | 0.09414  |
| 44 | 6  | 0 | -10.49421 | 5.02133  | 0.03469  |
| 45 | 6  | 0 | -9.13195  | 7.15063  | 0.06466  |
| 46 | 6  | 0 | -8.82882  | 7.78582  | 1.43587  |
| 47 | 6  | 0 | -8.60609  | 9.2937   | 1.251    |
| 48 | 6  | 0 | -9.93402  | 7.50639  | 2.4624   |
| 49 | 8  | 0 | -6.99531  | 5.20903  | 0.16658  |
| 50 | 8  | 0 | -11.57881 | 5.57158  | -0.02931 |
| 51 | 6  | 0 | -4.41091  | 1.38689  | 0.2531   |
| 52 | 6  | 0 | -3.02435  | 1.45517  | 0.28297  |
| 53 | 6  | 0 | -2.31072  | 0.23874  | 0.25806  |
| 54 | 6  | 0 | -3.01371  | -1.00105 | 0.23898  |
| 55 | 6  | 0 | -4.40343  | -1.06817 | 0.23245  |
| 56 | 6  | 0 | -5.11891  | 0.14733  | 0.22252  |
| 57 | 6  | 0 | -0.90034  | 0.04055  | 0.24371  |
| 58 | 6  | 0 | -0.52332  | -1.28364 | 0.22168  |
| 59 | 16 | 0 | -1.92472  | -2.37665 | 0.21402  |
| 60 | 6  | 0 | -6.53275  | 0.33366  | 0.16887  |
| 61 | 6  | 0 | -6.91179  | 1.6543   | 0.16814  |
| 62 | 16 | 0 | -5.51413  | 2.75378  | 0.22177  |
| 63 | 8  | 0 | -2.36476  | 2.66029  | 0.28362  |
| 64 | 8  | 0 | -5.04017  | -2.2782  | 0.16723  |
| 65 | 6  | 0 | -5.62564  | -2.75328 | 1.40217  |
| 66 | 6  | 0 | -6.38296  | -4.04703 | 1.11541  |
| 67 | 6  | 0 | -5.45476  | -5.14097 | 0.57156  |
| 68 | 6  | 0 | -7.11681  | -4.503   | 2.38517  |
| 69 | 6  | 0 | -2.05794  | 3.18808  | 1.59318  |
| 70 | 6  | 0 | -1.31177  | 4.50967  | 1.42635  |
| 71 | 6  | 0 | -2.16022  | 5.54872  | 0.68159  |
| 72 | 6  | 0 | -0.8614   | 5.0253   | 2.80114  |
| 73 | 6  | 0 | 2.79914   | -3.08804 | 0.18208  |
| 74 | 6  | 0 | 1.37879   | -3.03837 | 0.22518  |
| 75 | 6  | 0 | 0.83527   | -1.77148 | 0.18881  |
| 76 | 16 | 0 | 2.1675    | -0.60822 | 0.07966  |
| 77 | 6  | 0 | 3.4175    | -1.85449 | 0.10996  |
| 78 | 6  | 0 | 3.21812   | -4.50718 | 0.25975  |
| 79 | 7  | 0 | 2.02146   | -5.23838 | 0.36018  |
| 80 | 6  | 0 | 0.87247   | -4.42818 | 0.32898  |
| 81 | 6  | 0 | 1.96241   | -6.69569 | 0.42107  |
| 82 | 6  | 0 | 1.68159   | -7.25673 | 1.82875  |
| 83 | 6  | 0 | 1.52639   | -8.78162 | 1.73914  |



|     |    |   |          |          |          |
|-----|----|---|----------|----------|----------|
| 84  | 6  | 0 | 2.76836  | -6.86439 | 2.83788  |
| 85  | 8  | 0 | 4.32961  | -5.01259 | 0.24034  |
| 86  | 8  | 0 | -0.26754 | -4.85417 | 0.3757   |
| 87  | 6  | 0 | 7.32821  | -1.51951 | 0.00452  |
| 88  | 6  | 0 | 8.69732  | -1.74795 | 1.63E-04 |
| 89  | 6  | 0 | 9.54626  | -0.62465 | -0.08754 |
| 90  | 6  | 0 | 8.98818  | 0.68546  | -0.15382 |
| 91  | 6  | 0 | 7.61537  | 0.91288  | -0.14367 |
| 92  | 6  | 0 | 6.76523  | -0.20925 | -0.05816 |
| 93  | 6  | 0 | 10.96943 | -0.58931 | -0.13993 |
| 94  | 6  | 0 | 11.49351 | 0.68112  | -0.22764 |
| 95  | 16 | 0 | 10.22533 | 1.92562  | -0.25563 |
| 96  | 6  | 0 | 5.33905  | -0.23221 | -0.01105 |
| 97  | 6  | 0 | 4.81342  | -1.49965 | 0.06046  |
| 98  | 16 | 0 | 6.07791  | -2.75136 | 0.07783  |
| 99  | 8  | 0 | 9.20138  | -3.02557 | 0.03622  |
| 100 | 8  | 0 | 7.12352  | 2.19015  | -0.16188 |
| 101 | 6  | 0 | 6.57614  | 2.64171  | -1.42347 |
| 102 | 6  | 0 | 5.97211  | 4.02881  | -1.22226 |
| 103 | 6  | 0 | 7.02685  | 5.04951  | -0.77547 |
| 104 | 6  | 0 | 5.26228  | 4.47     | -2.51078 |
| 105 | 6  | 0 | 9.53807  | -3.51324 | 1.3541   |
| 106 | 6  | 0 | 10.05045 | -4.94588 | 1.22866  |
| 107 | 6  | 0 | 11.3079  | -5.02227 | 0.35266  |
| 108 | 6  | 0 | 10.29702 | -5.53102 | 2.62698  |
| 109 | 6  | 0 | 14.99893 | 2.08824  | -0.41442 |
| 110 | 6  | 0 | 13.58189 | 2.20373  | -0.37396 |
| 111 | 6  | 0 | 12.89864 | 1.00916  | -0.28611 |
| 112 | 16 | 0 | 14.09221 | -0.30009 | -0.23774 |
| 113 | 6  | 0 | 15.4737  | 0.79199  | -0.3599  |
| 114 | 6  | 0 | 15.57148 | 3.44846  | -0.54092 |
| 115 | 7  | 0 | 14.46636 | 4.31445  | -0.55598 |
| 116 | 6  | 0 | 13.23235 | 3.64138  | -0.47079 |
| 117 | 6  | 0 | 14.58914 | 5.76254  | -0.69186 |
| 118 | 6  | 0 | 14.99451 | 6.48651  | 0.60707  |
| 119 | 6  | 0 | 15.19627 | 7.97868  | 0.30671  |
| 120 | 6  | 0 | 13.97275 | 6.27674  | 1.73199  |
| 121 | 8  | 0 | 16.73127 | 3.82472  | -0.62358 |
| 122 | 8  | 0 | 12.1458  | 4.19023  | -0.48521 |
| 123 | 6  | 0 | 19.31874 | 0.0021   | -0.48027 |
| 124 | 6  | 0 | 20.70476 | 0.07023  | -0.56186 |
| 125 | 6  | 0 | 21.42492 | -1.13754 | -0.50995 |
| 126 | 6  | 0 | 20.72104 | -2.37104 | -0.38944 |
| 127 | 6  | 0 | 19.33321 | -2.442   | -0.31191 |

|     |    |   |           |          |          |
|-----|----|---|-----------|----------|----------|
| 128 | 6  | 0 | 18.61263  | -1.23113 | -0.36397 |
| 129 | 6  | 0 | 22.8494   | -1.3391  | -0.54652 |
| 130 | 6  | 0 | 23.19627  | -2.65031 | -0.47138 |
| 131 | 16 | 0 | 21.82727  | -3.73716 | -0.34935 |
| 132 | 6  | 0 | 17.19745  | -1.04118 | -0.32723 |
| 133 | 6  | 0 | 16.82004  | 0.27792  | -0.38717 |
| 134 | 16 | 0 | 18.21896  | 1.37157  | -0.49787 |
| 135 | 8  | 0 | 21.34282  | 1.28568  | -0.64702 |
| 136 | 8  | 0 | 18.70657  | -3.65772 | -0.24311 |
| 137 | 6  | 0 | 18.14912  | -4.01493 | 1.04326  |
| 138 | 6  | 0 | 17.3926   | -5.33231 | 0.89523  |
| 139 | 6  | 0 | 18.3188   | -6.47448 | 0.45767  |
| 140 | 6  | 0 | 16.66701  | -5.65793 | 2.20897  |
| 141 | 6  | 0 | 21.66606  | 1.71169  | -1.98779 |
| 142 | 6  | 0 | 22.33492  | 3.08244  | -1.91695 |
| 143 | 6  | 0 | 23.63491  | 3.03577  | -1.1032  |
| 144 | 6  | 0 | 22.57372  | 3.61639  | -3.33685 |
| 145 | 1  | 0 | -23.86424 | -0.27404 | -0.61981 |
| 146 | 1  | 0 | -22.68427 | -5.76841 | -0.31543 |
| 147 | 1  | 0 | -20.96481 | -5.8255  | 0.13771  |
| 148 | 1  | 0 | -20.31654 | -5.76797 | -2.25119 |
| 149 | 1  | 0 | -20.99444 | -8.11779 | -2.77443 |
| 150 | 1  | 0 | -20.56243 | -7.95041 | -1.06513 |
| 151 | 1  | 0 | -22.26723 | -8.03558 | -1.5476  |
| 152 | 1  | 0 | -22.02242 | -6.14721 | -4.04443 |
| 153 | 1  | 0 | -22.30345 | -4.60249 | -3.2316  |
| 154 | 1  | 0 | -23.32528 | -5.99545 | -2.85013 |
| 155 | 1  | 0 | -12.1734  | -0.11743 | -0.03506 |
| 156 | 1  | 0 | -19.01969 | 1.92658  | -0.36937 |
| 157 | 1  | 0 | -15.49809 | 5.04188  | 0.04652  |
| 158 | 1  | 0 | -16.02021 | 4.19003  | 1.52144  |
| 159 | 1  | 0 | -17.83659 | 5.80364  | -0.32569 |
| 160 | 1  | 0 | -19.48287 | 5.70916  | 1.56364  |
| 161 | 1  | 0 | -19.0995  | 4.08784  | 0.9746   |
| 162 | 1  | 0 | -18.37414 | 4.6804   | 2.48422  |
| 163 | 1  | 0 | -17.76476 | 7.58393  | 1.43273  |
| 164 | 1  | 0 | -16.14617 | 7.28187  | 0.77862  |
| 165 | 1  | 0 | -16.59973 | 6.63566  | 2.36604  |
| 166 | 1  | 0 | -15.13819 | -2.32265 | -2.04658 |
| 167 | 1  | 0 | -13.52545 | -1.57137 | -2.06511 |
| 168 | 1  | 0 | -12.63651 | -3.4515  | -0.70826 |
| 169 | 1  | 0 | -13.98398 | -5.51897 | -0.34606 |
| 170 | 1  | 0 | -14.74313 | -4.12885 | 0.45417  |
| 171 | 1  | 0 | -15.40024 | -4.7429  | -1.07444 |

|     |   |   |           |          |          |
|-----|---|---|-----------|----------|----------|
| 172 | 1 | 0 | -12.66502 | -5.1644  | -2.53429 |
| 173 | 1 | 0 | -12.46953 | -3.53652 | -3.20378 |
| 174 | 1 | 0 | -14.04131 | -4.3528  | -3.29291 |
| 175 | 1 | 0 | -8.3292   | 7.39189  | -0.63948 |
| 176 | 1 | 0 | -10.07582 | 7.53403  | -0.33484 |
| 177 | 1 | 0 | -7.89176  | 7.34237  | 1.79791  |
| 178 | 1 | 0 | -8.3457   | 9.76775  | 2.20372  |
| 179 | 1 | 0 | -7.79423  | 9.49784  | 0.54278  |
| 180 | 1 | 0 | -9.51331  | 9.78354  | 0.8739   |
| 181 | 1 | 0 | -9.68769  | 7.96439  | 3.4272   |
| 182 | 1 | 0 | -10.07037 | 6.43293  | 2.6316   |
| 183 | 1 | 0 | -10.89579 | 7.9152   | 2.12927  |
| 184 | 1 | 0 | -0.19667  | 0.86525  | 0.23428  |
| 185 | 1 | 0 | -7.25283  | -0.47431 | 0.12582  |
| 186 | 1 | 0 | -4.82402  | -2.92091 | 2.13607  |
| 187 | 1 | 0 | -6.30546  | -1.98921 | 1.79932  |
| 188 | 1 | 0 | -7.13392  | -3.81049 | 0.34885  |
| 189 | 1 | 0 | -6.02215  | -6.04885 | 0.3361   |
| 190 | 1 | 0 | -4.94442  | -4.81112 | -0.3377  |
| 191 | 1 | 0 | -4.68822  | -5.40813 | 1.31078  |
| 192 | 1 | 0 | -7.69069  | -5.41566 | 2.19044  |
| 193 | 1 | 0 | -7.8155   | -3.73827 | 2.74434  |
| 194 | 1 | 0 | -6.40947  | -4.72461 | 3.19494  |
| 195 | 1 | 0 | -2.99167  | 3.33632  | 2.15465  |
| 196 | 1 | 0 | -1.4436   | 2.45922  | 2.13952  |
| 197 | 1 | 0 | -0.41674  | 4.29758  | 0.82409  |
| 198 | 1 | 0 | -1.59619  | 6.47672  | 0.53322  |
| 199 | 1 | 0 | -2.47011  | 5.17541  | -0.29855 |
| 200 | 1 | 0 | -3.06473  | 5.79561  | 1.25312  |
| 201 | 1 | 0 | -0.29296  | 5.95585  | 2.6966   |
| 202 | 1 | 0 | -0.22292  | 4.29952  | 3.31881  |
| 203 | 1 | 0 | -1.72364  | 5.23571  | 3.44683  |
| 204 | 1 | 0 | 2.92484   | -7.05914 | 0.04822  |
| 205 | 1 | 0 | 1.17456   | -7.01706 | -0.26769 |
| 206 | 1 | 0 | 0.72412   | -6.83328 | 2.16007  |
| 207 | 1 | 0 | 1.28341   | -9.20598 | 2.71953  |
| 208 | 1 | 0 | 0.72703   | -9.0652  | 1.04433  |
| 209 | 1 | 0 | 2.45574   | -9.2537  | 1.39458  |
| 210 | 1 | 0 | 2.53692   | -7.26893 | 3.82992  |
| 211 | 1 | 0 | 2.85817   | -5.77729 | 2.93675  |
| 212 | 1 | 0 | 3.74829   | -7.2531  | 2.53445  |
| 213 | 1 | 0 | 11.57599  | -1.4878  | -0.12904 |
| 214 | 1 | 0 | 4.71376   | 0.65192  | -0.02615 |
| 215 | 1 | 0 | 5.80946   | 1.93366  | -1.76115 |

|     |   |   |          |          |          |
|-----|---|---|----------|----------|----------|
| 216 | 1 | 0 | 7.38059  | 2.66695  | -2.17264 |
| 217 | 1 | 0 | 5.218    | 3.93286  | -0.42878 |
| 218 | 1 | 0 | 6.56779  | 6.02899  | -0.59791 |
| 219 | 1 | 0 | 7.52011  | 4.73082  | 0.14717  |
| 220 | 1 | 0 | 7.79977  | 5.17699  | -1.54469 |
| 221 | 1 | 0 | 4.80078  | 5.45463  | -2.37732 |
| 222 | 1 | 0 | 4.47248  | 3.76557  | -2.79716 |
| 223 | 1 | 0 | 5.9688   | 4.54752  | -3.34742 |
| 224 | 1 | 0 | 10.30519 | -2.8625  | 1.79885  |
| 225 | 1 | 0 | 8.64499  | -3.47221 | 1.99186  |
| 226 | 1 | 0 | 9.25434  | -5.52769 | 0.74308  |
| 227 | 1 | 0 | 11.63766 | -6.0607  | 0.23392  |
| 228 | 1 | 0 | 11.121   | -4.60743 | -0.64205 |
| 229 | 1 | 0 | 12.13574 | -4.46181 | 0.80792  |
| 230 | 1 | 0 | 10.63172 | -6.5717  | 2.55604  |
| 231 | 1 | 0 | 9.38872  | -5.51248 | 3.24082  |
| 232 | 1 | 0 | 11.07497 | -4.9695  | 3.16015  |
| 233 | 1 | 0 | 15.3351  | 5.95436  | -1.46982 |
| 234 | 1 | 0 | 13.61655 | 6.12127  | -1.04234 |
| 235 | 1 | 0 | 15.9585  | 6.06679  | 0.92404  |
| 236 | 1 | 0 | 15.52811 | 8.51417  | 1.20303  |
| 237 | 1 | 0 | 15.94965 | 8.13487  | -0.47463 |
| 238 | 1 | 0 | 14.26046 | 8.44362  | -0.02978 |
| 239 | 1 | 0 | 14.2908  | 6.79735  | 2.64259  |
| 240 | 1 | 0 | 13.85415 | 5.21699  | 1.98169  |
| 241 | 1 | 0 | 12.98637 | 6.66309  | 1.44795  |
| 242 | 1 | 0 | 23.56417 | -0.52752 | -0.61221 |
| 243 | 1 | 0 | 24.19629 | -3.0648  | -0.47724 |
| 244 | 1 | 0 | 16.47441 | -1.84472 | -0.26134 |
| 245 | 1 | 0 | 18.96686 | -4.10931 | 1.7726   |
| 246 | 1 | 0 | 17.47331 | -3.22089 | 1.38238  |
| 247 | 1 | 0 | 16.63641 | -5.17558 | 0.11358  |
| 248 | 1 | 0 | 17.75175 | -7.40149 | 0.31395  |
| 249 | 1 | 0 | 18.82521 | -6.2343  | -0.48167 |
| 250 | 1 | 0 | 19.08706 | -6.66799 | 1.21813  |
| 251 | 1 | 0 | 16.09993 | -6.59056 | 2.11435  |
| 252 | 1 | 0 | 15.96354 | -4.86437 | 2.48643  |
| 253 | 1 | 0 | 17.3784  | -5.78669 | 3.03517  |
| 254 | 1 | 0 | 22.33654 | 0.97494  | -2.4542  |
| 255 | 1 | 0 | 20.74437 | 1.75791  | -2.58349 |
| 256 | 1 | 0 | 21.63099 | 3.75435  | -1.40599 |
| 257 | 1 | 0 | 24.07902 | 4.03432  | -1.01999 |
| 258 | 1 | 0 | 23.45344 | 2.65659  | -0.09342 |
| 259 | 1 | 0 | 24.37469 | 2.38317  | -1.58657 |

|     |   |   |          |         |          |
|-----|---|---|----------|---------|----------|
| 260 | 1 | 0 | 23.02149 | 4.61565 | -3.30342 |
| 261 | 1 | 0 | 21.63941 | 3.68687 | -3.90638 |
| 262 | 1 | 0 | 23.25941 | 2.9658  | -3.89492 |

---

## Reference

1. Gaussian 09. M. J. Frisch, G. W. Trucks, H. B. Schlegel, G. E. Scuseria, M. A. Robb, J. R. Cheeseman, G. Scalmani, V. Barone, B. Mennucci, G. A. Petersson, H. Nakatsuji, M. Caricato, X. Li, H. P. Hratchian, A. F. Izmaylov, J. Bloino, G. Zheng, J. L. Sonnenberg, M. Hada, M. Ehara, K. Toyota, R. Fukuda, J. Hasegawa, M. Ishida, T. Nakajima, Y. Honda, O. Kitao, H. Nakai, T. Vreven, J. A. Montgomery Jr., J. E. Peralta, F. Ogliaro, M. J. Bearpark, J. J. Heyd, E. N. Brothers, K. N. Kudin, V. N. Staroverov, R. Kobayashi, J. Normand, K. Raghavachari, A. P. Rendell, J. C. Burant, S. S. Iyengar, J. Tomasi, M. Cossi, N. Rega, J. M. Millam, M. Klene, J. E. Knox, J. B. Cross, V. Bakken, C. Adamo, J. Jaramillo, R. Gomperts, R. E. Stratmann, O. Yazyev, A. J. Austin, R. Cammi, C. Pomelli, J. W. Ochterski, R. L. Martin, K. Morokuma, V. G. Zakrzewski, G. A. Voth, P. Salvador, J. J. Dannenberg, S. Dapprich, A. D. Daniels, ö. Farkas, J. B. Foresman, J. V. Ortiz, J. Cioslowski and D. J. Fox, Gaussian, Inc., Wallingford CT, 2009.
2. A. D. Becke, *J. Chem. Phys.*, 1993, **98**, 5648-5652.
3. G. Igel-Mann, H. Stoll and H. Preuss, *Mol. Phys.*, 1988, **65**, 1321-1328.
4. L. Chengteh, Y. Weitao and G. P. Robert, *Phys. Rev. B*, 1988, **37**, 785.
5. V. A. Rassolov, J. A. Pople, M. A. Ratner and T. L. Windus, *J. Chem. Phys.*, 1998, **109**, 1223-1229.
6. V. A. Rassolov, M. A. Ratner, J. A. Pople, P. C. Redfern and L. A. Curtiss, *J. Comput. Chem.*, 2001, **22**, 976-984.
7. J. Li, D. Han, Q. Zhang, Z. He and Y. Lu, *J. Polym. Sci.*, 2021, **59**, 240-250.
8. P. B. Pati, G. Damas, L. Tian, D. L. A. Fernandes, L. Zhang, I. B. Pehlivan, T. Edvinsson, C. M. Araujo and H. Tian, *Energy Environ. Sci.*, 2017, **10**, 1372-1376.
9. A. M. Elewa, J. Jayakumar, Y.-W. Huang, M. H. Elsayed, C.-L. Chang, L.-Y. Ting, W.-C. Lin, C.-C. Chueh and H.-H. Chou, *J. Environ. Chem. Eng.*, 2022, **10**, 106927.
10. L. Wang, R. Fernández-Terán, L. Zhang, D. L. A. Fernandes, L. Tian, H. Chen and H. Tian, *Angew. Chem. Int. Ed.*, 2016, **55**, 12306-12310.
11. M. E. Ahmed, L. Chuang-Yi, L. Wei-Long, M. A. M. Islam and C. Ho-Hsiu, *Macromolecules*, 2022, **56**, 1352-1361.
12. M. H. Elsayed, J. Jayakumar, M. Abdellah, T. H. Mansoure, K. Zheng, A. M. Elewa, C.-L. Chang, L.-Y. Ting, W.-C. Lin, H.-h. Yu, W.-H. Wang, C.-C. Chung and H.-H. Chou, *Appl. Catal., B*, 2021, **283**, 119659.
13. C.-L. Chang, W.-C. Lin, C.-Y. Jia, L.-Y. Ting, J. Jayakumar, M. H. Elsayed, Y.-Q. Yang, Y.-H. Chan, W.-S. Wang, C.-Y. Lu, P.-Y. Chen and H.-H. Chou, *Appl. Catal., B*, 2020, **268**, 118436.
14. W.-C. Lin, M. H. Elsayed, J. Jayakumar, L.-Y. Ting, C.-L. Chang, A. M. Elewa, W.-S. Wang, C.-C. Chung, C.-Y. Lu and H.-H. Chou, *Int. J. Hydrogen Energ.*, 2020, **45**, 32072-32081.
15. P. Zhao, L. Wang, Y. Wu, T. Yang, Y. Ding, H. G. Yang and A. Hu, *Macromolecules*, 2019, **52**, 4376-4384.
16. Z. Wang, N. Mao, Y. Zhao, T. Yang, F. Wang and J.-X. Jiang, *Polym. Bull.*, 2019, **76**, 3195-3206.
17. P.-J. Tseng, C.-L. Chang, Y.-H. Chan, L.-Y. Ting, P.-Y. Chen, C.-H. Liao, M.-L. Tsai and H.-H. Chou, *ACS Catal.*, 2018, **8**, 7766-7772.
18. D. J. Woods, S. A. J. Hillman, D. Pearce, L. Wilbraham, L. Q. Flagg, W. Duffy, I. McCulloch, J. R. Durrant, A. A. Y. Guilbert, M. A. Zwijnenburg, R. S. Sprick, J. Nelson and A. I. Cooper, *Energy Environ. Sci.*, 2020, **13**, 1843-1855.
19. Z. Hu, Z. Wang, X. Zhang, H. Tang, X. Liu, F. Huang and Y. Cao, *Iscience*, 2019, **13**, 33-42.
20. Z. Hu, X. Zhang, Q. Yin, X. Liu, X.-f. Jiang, Z. Chen, X. Yang, F. Huang and Y. Cao, *Nano Energy*, 2019, **60**, 775-783.
21. C. Dai, M. Panahandeh-Fard, X. Gong, C. Xue and B. Liu, *Sol. RRL*, 2019, **3**, 1800255.
22. Y. Hu, Y. Liu, J. Wu, Y. Li, J. Jiang and F. Wang, *ACS Appl. Mater. Interfaces*, 2021, **13**, 42753-42762.
